1 Community occurrence of metapneumovirus, influenza A, and respiratory syncytial virus (RSV)  
2 inferred from wastewater solids during the winter 2022-2023 tripledemic

3

4 **Authors**

5 Alexandria B. Boehm<sup>1\*</sup>, Marlene K. Wolfe<sup>2</sup>, Bradley White<sup>3</sup>, Bridgette Hughes<sup>3</sup>, Dorothea Duong<sup>3</sup>,  
6 Amanda Bidwell<sup>1</sup>

7

8

9 **Affiliations**

10 1. Department of Civil & Environmental Engineering, School of Engineering and Doerr School of  
11 Sustainability, Stanford University, Stanford, CA, USA

12 2. Gangarosa Department of Environmental Health, Rollins School of Public Health, Emory  
13 University, Atlanta, GA, USA

14 3. Verily Life Sciences, South San Francisco, CA, USA

15

16

17

18 \*corresponding author: Alexandria Boehm (aboehm@stanford.edu)

19

20

21

22  
23  
24  
25  
26  
27  
28  
29  
30  
31  
32  
33  
34  
35  
36  
37  
38  
39

**Abstract**

Wastewater monitoring can provide insights into respiratory disease occurrence in communities that contribute to the wastewater system. Using daily measurements of RNA of influenza A (IAV), respiratory syncytial virus (RSV), and human metapneumovirus (HMPV), as well as SARS-CoV-2 in wastewater solids from eight publicly owned treatment works in the Greater San Francisco Bay Area of California between July 2022 until early May 2023, we identify a “triple-demic” when concentrations of IAV, RSV, and SARS-CoV-2 peaked at approximately the same time. HMPV was also widely circulating. We designed novel hydrolysis probe RT-PCR assays for different IAV subtype makers to discern that the dominant circulating IAV subtype was H3N2. We show that wastewater data can be used to identify onset and offset of wastewater disease occurrence events that can provide insight into disease epidemiology and timely, localized information to inform hospital staffing and clinical decision making to respond to circulating viruses. Whereas RSV and IAV wastewater events were mostly regionally coherent, HMPV events displayed localized occurrence patterns.

## 40 Introduction

41  
42 Acute respiratory illness (ARI) accounts for a large burden of infectious disease<sup>1,2</sup>; and is a  
43 leading cause of death for children under 5 globally<sup>3</sup>. ARI surveillance in the United States  
44 (US), and much of the world, is passive, relying on institutions to identify specific diseases  
45 through clinical specimens and regularly reporting results to a government agency. As a result,  
46 ARI surveillance is biased towards identifying infections in individuals with co-morbidities and/or  
47 where symptoms are severe<sup>4</sup>. Resultant lack of knowledge on occurrence and trends in  
48 circulating respiratory disease dynamics limits institutional awareness to guide public health  
49 response and clinical decision making. Additionally, the lack of robust, unbiased data on  
50 disease occurrence limits efforts to understand disease epidemiology.

51  
52 During the COVID-19 pandemic, the circulation of respiratory viruses changed dramatically  
53 according to both clinical surveillance<sup>5,6</sup> and wastewater monitoring<sup>7</sup>. For example, in the US,  
54 there was limited influenza or RSV circulation in the northern hemisphere winter of 2021-  
55 2022<sup>5,8</sup>. During winter 2022-2023, the US experienced a “triple-demic” of respiratory viruses as  
56 clinics and hospitals recorded large numbers SARS-CoV-2, influenza, and RSV infections, at  
57 times overwhelming hospital capacity particularly in pediatric units<sup>9</sup>. Nearly 40% of United  
58 States households reported being infected by SARS-CoV-2, influenza, or RSV during the  
59 triple-demic period<sup>10</sup>.

60  
61 In the present study, we explore the potential for wastewater monitoring, also referred to as  
62 wastewater-base epidemiology, to inform the onset and progression of important respiratory  
63 viruses during this triple-demic period in the United States. We measured concentrations of  
64 genomic nucleic-acids of influenza A (IAV), RSV, SARS-CoV-2, as well as human  
65 metapneumovirus (HMPV) in wastewater solids daily in eight publicly owned treatment works

66 (POTWs) in the Greater San Francisco Bay Area of California, USA during winter 2022-2023.  
67 We find that the unusual co-occurrence of the onset of these outbreaks is identifiable using  
68 wastewater monitoring, and moreover HMPV was also circulating. Whereas clinical testing data  
69 are affected by an individual's test seeking behavior and test availability<sup>11-13</sup>, as well as  
70 institutional reporting delays which can be weeks in duration<sup>14,15</sup>, wastewater data are available  
71 within 24 hours of sample collection and provide information about the entire community  
72 contributing to the wastewater system. We posit that wastewater can be used to help identify  
73 the onset and offset of respiratory virus transmission events, as well as the peak of such events.  
74 This in turn can inform clinical decision making as well as institutional public health messaging  
75 and individual behaviors.

76

## 77 **Methods**

78

79 **Sample collection.** Eight POTWs located in the greater San Francisco Bay Area (extending to  
80 Sacramento) in California, USA contributed daily samples of wastewater settled solids for the  
81 prospective study (Figure S1, additional POTW details are in Wolfe et al.<sup>16</sup>). Approximately  
82 50 ml of settled solids were collected daily between 7/1/22 (month/day/year format) and 5/7/23.  
83 Additional details of sample collection are in the SI. Samples were immediately stored at 4°C  
84 and transported to the laboratory where processing began within 6 h of collection. 2472 samples  
85 were collected.

86

87 **Sample preparation and RNA extraction.** Details of sample preparation and nucleic-acid  
88 extraction have been described in detail elsewhere<sup>7,16-18</sup> and are described briefly in the SI.  
89 RNA was extracted from 10 replicate aliquots per sample and then subjected to an inhibitor  
90 removal step. Extraction-negative controls (water) and extraction-positive controls were  
91 extracted using the same protocol as the homogenized samples. The positive controls consisted

92 of SARS-CoV-2 genomic RNA (ATCC VR-1986D), Twist Synthetic Influenza A H3N2 RNA  
93 Control (Twist 103002), Intact RSV B virus (Zepto NATFVP-NNS), and a gene block (double-  
94 stranded DNA [dsDNA] purchased from IDT) for the HMPV target in the BCoV-spiked DNA/RNA  
95 shield solution described above.

96  
97 **Droplet digital PCR.** RNA extracts were used as template in digital droplet RT-PCR assays for  
98 PMMoV, BCoV, SARS-CoV-2 N, IAV M, RSV N, and HMPV L gene targets in multiplex assays  
99 which have been previously published<sup>7,19</sup>. Each of the 10 replicate nucleic-acid extracts were  
100 run in their own well. Assays were multiplexed using the probe mixing approach (see SI and  
101 Table S1). PMMoV is highly abundant in wastewater globally<sup>20</sup> and is used here as an internal  
102 recovery and fecal strength control<sup>21</sup>. Undiluted extract was used for the human viral assay  
103 template, and a 1:100 dilution of the extract was used for the BCoV/PMMoV assay template.  
104 Details of the digital RT-PCR have been published and are included in the SI.

105  
106 Concentrations of RNA targets were converted to concentrations per dry weight of solids in units  
107 of cp/g using dimensional analysis. The total error is reported as standard deviations and  
108 includes the errors associated with the Poisson distribution and the variability among the 10  
109 replicates. BCoV recovery was determined by normalizing the BCoV concentration by the  
110 expected concentration given the value measured in the spiked DNA/RNA shield. BCoV  
111 recovery was used as a process control and not used in the calculation of concentrations;  
112 samples were rerun in cases where the recovery of BCoV was less than 1%.

113  
114 **Influenza subtypes.** We designed and tested novel RT-PCR primers and internal hydrolysis  
115 probes targeting the H1 subtype of the hemagglutinin (HA) gene, H3 subtype of the HA gene,  
116 N1 subtype of the neuraminidase (NA) gene, and N2 subtype of the NA gene of IAV. Primers

117 and probes were then screened for specificity in silico, and in vitro against other respiratory and  
118 enteric viruses (see SI, Table S2).

119  
120 We retrospectively tested two samples per week between 7/1/22 and 3/31/23 (covering most of  
121 the IAV wastewater event) from SJ POTW for the four influenza A subtype markers (N1, N2, H1,  
122 H3). We also re-analyzed the samples to quantify the IAV M gene in order to report the ratio of  
123 the subtype markers to M gene (see SI).

124  
125 **Clinical data.** We used state-aggregated weekly clinical sample positivity rates from sentinel  
126 laboratories for IAV, RSV and HMPV. IAV, RSV, and a fraction of the HMPV data are publicly  
127 available<sup>22</sup>, the remaining HMPV data were provided by California Department of Public Health  
128 (CDPH). State-aggregated daily positivity rates for COVID-19 are publicly available  
129 (<https://data.chhs.ca.gov/dataset/covid-19-time-series-metrics-by-county-and-state>).

130  
131 **Data analysis.** Human viral RNA concentrations were normalized by PMMoV RNA; 5-d trimmed  
132 averages were used to visualize data and identify the date of their peak maximum  
133 concentrations. The onset dates of IAV, RSV, and HMPV wastewater events were identified as  
134 the first day for which all samples in a 14-d look back period had concentration higher than 2000  
135 copies/g., which is approximately twice the lowest detectable concentration. The offset dates of  
136 IAV, RSV, and HMPV wastewater events were identified as the first day after an onset event for  
137 which only 7 samples during a 14-d look back period had concentrations over 2000 copies/g.

138  
139 We tested whether PMMoV-normalized viral RNA concentrations at each POTW were  
140 correlated to the same measurements at the other eight POTWs ( $28*4 = 112$  hypothesis tests),  
141 and whether PMMoV-normalized viral RNA concentrations were correlated within POTWs (48  
142 tests) using Kendall's tau as these data tend to not be normally distributed. We also tested the

143 hypothesis that PMMoV-normalized viral RNA correlated to state-aggregated positivity rates (32  
144 tests). Since IAV, RSV, and HMPV positivity rates are aggregated weekly, we used weekly  
145 median PMMoV-normalized viral RNA concentrations to test the hypothesis. We used a p value  
146 of 0.00026 (0.05/192) which corresponds to  $\alpha = 0.05$  with a Bonferroni correction. Results  
147 were similar when analyses were carried out with variables that were not PMMoV-normalized.

148  
149 This study was reviewed by the State of California Health and Human Services Agency  
150 Committee for the Protection of Human Subjects and determined to be Exempt from oversight.  
151 Wastewater data are publicly available (<https://purl.stanford.edu/gp563rt4747>). Data collected  
152 between 7/1/22 and 12/31/22 are publicly available through a Data Descriptor<sup>23</sup>.

153

## 154 **Results**

155

156 **QA/QC.** Results are reported as suggested in the Environmental Microbiology Minimal  
157 Information guidelines<sup>24</sup> (Figure S2). Extraction and PCR negative and positive controls  
158 performed as expected (negative and positive, respectively). Median BCoV recovery in these  
159 solids samples was 1.2 (interquartile range = 0.92-1.72, n=2472); values greater than 1 are  
160 likely a result of uncertainty in quantifying the amount of BCoV spiked in the DNA/RNA shield.

161

162 **Novel IAV subtype assay sensitivity and specificity.** In silico analysis indicated no cross  
163 reactivity of the novel RT-PCR probe-based assays (Table S3) with sequences deposited in  
164 NCBI. The novel assays for IAV N1, N2, H1 and H3 were tested in vitro against non-target viral  
165 gRNA as well as target gRNA. No cross reactivity was observed.

166

167 **Viral RNA in wastewater solids.** Viral concentrations were dynamic over the project duration,  
168 with most showing elevated concentrations in the winter (Figure 1). PMMoV-normalized HMPV,

169 IAV, RSV, and SARS-CoV-2 RNA concentrations were each positively and significantly  
170 associated between the eight POTWs, respectively (IAV tau: 0.49 to 0.64, RSV tau: 0.53 to  
171 0.71, HMPV tau: 0.37 to 0.56, SARS-CoV-2 tau: 0.27 to 0.45, all  $p < 10^{-12}$ , Figure S3) suggesting  
172 coarse temporal coherence across the region.

173  
174 Within each POTW, PMMoV-normalized IAV, RSV, HMPV, and SARS-CoV-2 RNA  
175 concentrations were generally positively associated with each other suggesting coherence  
176 within a POTW (tau: 0.15 to 0.56, all  $p < 0.00026$ , depending on POTW and specific  
177 measurements, Figure S4). The exceptions are at PA where HMPV was not associated with  
178 IAV, at Gil where HMPV was not associated with SARS-CoV-2, and at SAC and Ocean, where  
179 HMPV was not significantly associated with IAV or SARS-CoV-2. Taus were generally highest  
180 between IAV and RSV, and slowest between HMPV and both IAV and SARS-CoV-2.

181  
182 State-aggregated clinical specimen positivity rates for IAV, RSV, HMPV, and SARS-CoV-2  
183 show peaks in winter months (Figure S5). Weekly median PMMoV-normalized concentrations of  
184 all viruses were significantly, positively correlated with the associated clinical positivity rate (see  
185 SI, all  $p < 10^{-6}$ ).

186  
187 The peak wastewater concentrations varied across POTWs for the different viral targets (Table  
188 1). Peak RSV occurred between 11/25/22 and 12/14/22, peak IAV occurred between 26 Nov  
189 and 13 Dec, and peak HMPV occurred between 11/26/22 and 3/30/23, depending on POTW.  
190 For context, peak SARS-CoV-2 occurred between 11/30/22 and 3/16/23.

191  
192 We identified dates of wastewater event onsets and offsets for RSV, IAV, and HMPV, but not for  
193 SARS-CoV-2 as its levels were such that the entire period of the study would be defined as a  
194 wastewater event (Table 1). We observed wintertime RSV wastewater events at all 8 POTWs



195 with onsets between 9/17/22 and 10/24/22, and offsets between 3/20/23 and 4/29/23,  
196 depending on POTW. The period of time between onset and offset varied between 147 and 215  
197 days (median = 190 days).

198  
199 We observed a summer IAV wastewater event at two POTWs (SJ and PA); both onset on  
200 7/14/22 and offset on 7/23/22 (SJ) and 9/21/22 (PA). We observed wintertime wastewater  
201 events at all 8 POTWs with onsets between 10/26/22 and 11/18/22 and offsets between 1/25/23  
202 and 3/3/23. The duration of the wintertime events ranged from 73 and 122 days (median = 104  
203 days). IAV subtype analysis at SJ did not detect N1, but detected N2, H1, and H3. When  
204 detected, the ratio of N2/IAV ranged from 0.3 to over 1 (median = 0.6), H1/IAV ranged from from  
205 0.03 to 0.35 (median = 0.07), and H3/IAV ranged from from 0.1 to 0.4 (median = 0.2) (Figure  
206 S6).

207  
208 We observed a fall HMPV wastewater event at one POTW (SE) with onset on 9/1/22 and offset  
209 on 9/24/22. We observed wintertime HMPV wastewater events for all 8 POTWs with onsets  
210 between 8/6/22 and 12/3/22. Data from the 8 POTWs indicated on 5/7/23, the end of the study,  
211 that none of the HMPV events had offset suggesting minimal durations (assuming offset  
212 occurred on 5/8, the day after the study ended) between 156 and 275 days (median = 187  
213 days).

214  
215 **Discussion**

216  
217 Influenza A, RSV, and SARS-CoV-2 RNA in wastewater solids in the Greater San Francisco  
218 Bay Area of California are reflective of the winter 2022-2023 “triple-demic” when cases of  
219 influenza, RSV, and COVID-19 increased dramatically with similar onset periods, sometimes  
220 overwhelming hospital capacity<sup>9</sup>. Wastewater monitoring of human metapneumovirus (HMPV)

221 RNA suggests HMPV was also circulating in communities during the tripledemic, but with  
222 slightly different outbreak timing and continued activity after IAV and RSV offset in most areas.  
223 HMPV was discovered in 2001<sup>25</sup> and clinical presentation can be indistinguishable from  
224 influenza and RSV<sup>26</sup>. Hospitalization rates associated with HMPV for children are similar to  
225 those for influenza<sup>27</sup>. Although there are vaccines available for IAV<sup>28</sup> and the first vaccine was  
226 approved by the FDA for RSV in 2023 (although only for adults age > 60 yo)<sup>29,30</sup>, there is no  
227 HMPV vaccine currently available<sup>31</sup>. IAV subtype analysis suggested that H3N2 was more  
228 common than H1N1, consistent with subtyping of clinical samples<sup>22</sup>.

229  
230 Wastewater data was able to resolve information on occurrence patterns at higher resolution  
231 than clinical data, showing differences in occurrence patterns of IAV, RSV, SARS-CoV-2, and  
232 HMPV community infections. For IAV, we identified two localized summertime events at two  
233 POTWs located 15 km apart in Santa Clara County and a late localized fall HMPV event was  
234 identified at one POTW located in San Francisco County, neither of which were reflected in their  
235 respective state-aggregated positivity rate data.

236  
237 Wintertime wastewater events were evident for IAV, RSV, and HMPV, but their characteristics  
238 differed. IAV events were temporally coherent throughout the region with onsets, peaks, and  
239 offsets occurring at all POTWs within the same three, three, and five week windows,  
240 respectively. RSV events were also regionally temporally coherent; all POTWs had onsets,  
241 peaks, and offsets within the same five, three, and five week windows, respectively. However,  
242 wintertime RSV onset and offsets occurred one month earlier and later, respectively, than those  
243 of IAV across all POTWs, a pattern also discernible in the state-aggregated clinical data. RSV  
244 peak concentrations occurred at the same time as peak IAV concentrations. SARS-CoV-2  
245 concentrations also had local peaks at the same time as RSV and IAV suggesting community

246 infections reach their height in unison, consistent with reports of the triple endemic overwhelming  
247 some hospital capacities<sup>9</sup>.

248  
249 HMPV wastewater events differed widely in the timing of onset and peak among the eight  
250 POTWs, suggesting localized dynamics; onsets dates varied by up to 4 months and the timing  
251 of the peak varied by up to 5 months. Localized HMPV dynamics is further supported by the  
252 relatively weak correlations between HMPV concentrations and concentrations of the other  
253 viruses that showed patterns of regional coherence. Although HMPV concentrations were  
254 positively associated with the state-aggregated positivity rate data, there are clearly localized  
255 dynamics in the wastewater events that are not reflected in the state-aggregated clinical data.  
256 More localized data on HMPV circulation is not available as testing is extremely limited<sup>7</sup>.

257 Previous studies of clinical HMPV infections suggest variable seasonal infection from year-to-  
258 year in contrast to typical patterns in seasonal RSV and IAV infections<sup>27</sup>.

259  
260 A global systematic review<sup>32</sup> indicates that seasonal IAV, RSV, and HMPV epidemics typically  
261 overlap. RSV epidemics typically start earlier than IAV epidemics by 0.3 months in temperate  
262 regions<sup>32</sup>. In our study RSV wastewater events onset 1.2 months (median) before IAV. The  
263 same review indicates IAV and RSV epidemics in temperate areas are 3.8 and 4.6 months in  
264 duration, respectively. Wastewater events for IAV and RSV were 3.5 and 4.8 months in duration  
265 (medians). Temperate HMPV epidemics began 1.7 months after RSV and were 4.8 months in  
266 duration. In the present study, HMPV wastewater events began 1 month after RSV (median),  
267 and were at least 6.3 months in duration.

268  
269 While the clinical test positivity data used here provides insight into disease circulation during  
270 the study time period, there is no data on community incidence or prevalence of IAV, RSV, or  
271 HMPV in the study area. Additionally, data on COVID-19 incidence and prevalence degraded

272 during this time period owing to the wide availability of at home rapid tests<sup>12,33</sup>, the results of  
273 which are not reportable to public health agencies in our study area. IAV, RSV, HMPV, and  
274 COVID-19 test positivity rates serve as proxies for trends in disease occurrence, but it is  
275 important to acknowledge that the rates reflect those of severely symptomatic cases. There is  
276 also a significant delay in those data being available, usually with results available and updated  
277 2-4 weeks after specimen collection. Wastewater represents composite biological samples from  
278 an entire community including those who are asymptomatic or mildly symptomatic. Wastewater  
279 therefore complements data on clinical test positivity. Given the delays associated with the  
280 positivity rate data, and the sparseness of localized positivity rate data, wastewater can serve as  
281 an indicator of the first onsets of localized, community infections. While spatial and temporal  
282 coherence was observed for IAV and RSV events, HMPV showed more localized dynamics.  
283 This has been shown previously for other diseases; localized dynamics of mpox were also  
284 evident from wastewater monitoring<sup>34</sup>. We explored other methods of identifying wastewater  
285 events including using different concentration thresholds and look-back periods. All gave similar  
286 relative results among the viruses; a public health organization could decide on data analysis  
287 methods for identifying wastewater events that were fit for their purposes.

288

289 **Supporting Information.** Additional methodological details as well as Tables S1-S3, and  
290 Figures S1-S6.

291

292 **Acknowledgements.** We acknowledge the numerous people who contributed to wastewater  
293 sample collection and Allegra Koch for her support with the literature review. This research was  
294 performed on the ancestral and unceded lands of the Muwekma Ohlone people. We pay our  
295 respects to them and their Elders, past and present, and are grateful for the opportunity to live  
296 and work here.

297

298

299

300 **References**

301

- 302 (1) Jin, X.; Ren, J.; Li, R.; Gao, Y.; Zhang, H.; Li, J.; Zhang, J.; Wang, X.; Wang, G. Global  
303 Burden of Upper Respiratory Infections in 204 Countries and Territories, from 1990 to  
304 2019. *eClinicalMedicine* **2021**, *37*. <https://doi.org/10.1016/j.eclinm.2021.100986>.
- 305 (2) Vos, T.; Lim, S. S.; Abbafati, C.; Abbas, K. M.; Abbasi, M.; Abbasifard, M.; Abbasi-  
306 Kangevari, M.; Abbastabar, H.; Abd-Allah, F.; Abdelalim, A.; Abdollahi, M.; Abdollahpour,  
307 I.; Abolhassani, H.; Aboyans, V.; Abrams, E. M.; Abreu, L. G.; Abrigo, M. R. M.; Abu-  
308 Raddad, L. J.; Abushouk, A. I.; Acebedo, A.; Ackerman, I. N.; Adabi, M.; Adamu, A. A.;  
309 Adebayo, O. M.; Adekanmbi, V.; Adelson, J. D.; Adetokunboh, O. O.; Adham, D.; Afshari,  
310 M.; Afshin, A.; Agardh, E. E.; Agarwal, G.; Agesa, K. M.; Aghaali, M.; Aghamir, S. M. K.;  
311 Agrawal, A.; Ahmad, T.; Ahmadi, A.; Ahmadi, M.; Ahmadi, H.; Ahmadpour, E.; Akalu, T.  
312 Y.; Akinyemi, R. O.; Akinyemiju, T.; Akombi, B.; Al-Aly, Z.; Alam, K.; Alam, N.; Alam, S.;  
313 Alam, T.; Alanzi, T. M.; Albertson, S. B.; Alcalde-Rabanal, J. E.; Alema, N. M.; Ali, M.; Ali,  
314 S.; Alicandro, G.; Aljanzadeh, M.; Alinia, C.; Alipour, V.; Aljunid, S. M.; Alla, F.; Allebeck,  
315 P.; Almasi-Hashiani, A.; Alonso, J.; Al-Raddadi, R. M.; Altirkawi, K. A.; Alvis-Guzman, N.;  
316 Alvis-Zakzuk, N. J.; Amini, S.; Amini-Rarani, M.; Aminorroaya, A.; Amiri, F.; Amit, A. M. L.;  
317 Amugsi, D. A.; Amul, G. G. H.; Anderlini, D.; Andrei, C. L.; Andrei, T.; Anjomshoa, M.;  
318 Ansari, F.; Ansari, I.; Ansari-Moghaddam, A.; Antonio, C. A. T.; Antony, C. M.;  
319 Antriyandarti, E.; Anvari, D.; Anwer, R.; Arabloo, J.; Arab-Zozani, M.; Aravkin, A. Y.; Ariani,  
320 F.; Ärnlöv, J.; Aryal, K. K.; Arzani, A.; Asadi-Aliabadi, M.; Asadi-Pooya, A. A.; Asghari, B.;  
321 Ashbaugh, C.; Atnafu, D. D.; Atre, S. R.; Ausloos, F.; Ausloos, M.; Ayala Quintanilla, B. P.;  
322 Ayano, G.; Ayanore, M. A.; Aynalem, Y. A.; Azari, S.; Azarian, G.; Azene, Z. N.; Babae,  
323 E.; Badawi, A.; Bagherzadeh, M.; Bakhshaei, M. H.; Bakhtiari, A.; Balakrishnan, S.; Balalla,  
324 S.; Balassyano, S.; Banach, M.; Banik, P. C.; Bannick, M. S.; Bante, A. B.; Baraki, A. G.;  
325 Barboza, M. A.; Barker-Collo, S. L.; Barthelemy, C. M.; Barua, L.; Barzegar, A.; Basu, S.;  
326 Baune, B. T.; Bayati, M.; Bazmandegan, G.; Bedi, N.; Beghi, E.; Béjot, Y.; Bello, A. K.;  
327 Bender, R. G.; Bennett, D. A.; Bennitt, F. B.; Bensenor, I. M.; Benziger, C. P.; Berhe, K.;  
328 Bernabe, E.; Bertolacci, G. J.; Bhageerathy, R.; Bhala, N.; Bhandari, D.; Bhardwaj, P.;  
329 Bhattacharyya, K.; Bhutta, Z. A.; Bibi, S.; Biehl, M. H.; Bikbov, B.; Bin Sayeed, M. S.;  
330 Biondi, A.; Biriha, B. M.; Bisanzio, D.; Bisignano, C.; Biswas, R. K.; Bohlouli, S.; Bohluli,  
331 M.; Bolla, S. R. R.; Bolor, A.; Boon-Dooley, A. S.; Borges, G.; Borzi, A. M.; Bourne, R.;  
332 Brady, O. J.; Brauer, M.; Brayne, C.; Breitborde, N. J. K.; Brenner, H.; Briant, P. S.; Briggs,  
333 A. M.; Briko, N. I.; Britton, G. B.; Bryazka, D.; Buchbinder, R.; Bumgarner, B. R.; Busse, R.;  
334 Butt, Z. A.; Caetano dos Santos, F. L.; Cámera, L. L. A.; Campos-Nonato, I. R.; Car, J.;  
335 Cárdenas, R.; Carreras, G.; Carrero, J. J.; Carvalho, F.; Castaldelli-Maia, J. M.;  
336 Castañeda-Orjuela, C. A.; Castelpietra, G.; Castle, C. D.; Castro, F.; Catalá-López, F.;  
337 Causey, K.; Cederroth, C. R.; Cercy, K. M.; Cerin, E.; Chandan, J. S.; Chang, A. R.;  
338 Charlson, F. J.; Chattu, V. K.; Chaturvedi, S.; Chimed-Ochir, O.; Chin, K. L.; Cho, D. Y.;  
339 Christensen, H.; Chu, D.-T.; Chung, M. T.; Cicuttini, F. M.; Ciobanu, L. G.; Cirillo, M.;  
340 Collins, E. L.; Compton, K.; Conti, S.; Cortesi, P. A.; Costa, V. M.; Cousin, E.; Cowden, R.  
341 G.; Cowie, B. C.; Cromwell, E. A.; Cross, D. H.; Crowe, C. S.; Cruz, J. A.; Cunningham, M.;  
342 Dahlawi, S. M. A.; Damiani, G.; Dandona, L.; Dandona, R.; Darwesh, A. M.; Daryani, A.;  
343 Das, J. K.; Das Gupta, R.; das Neves, J.; Dávila-Cervantes, C. A.; Davletov, K.; De Leo,  
344 D.; Dean, F. E.; DeCleene, N. K.; Deen, A.; Degenhardt, L.; Dellavalle, R. P.; Demeke, F.  
345 M.; Demsie, D. G.; Denova-Gutiérrez, E.; Dereje, N. D.; Dervenis, N.; Desai, R.; Desalew,  
346 A.; Dessie, G. A.; Dharmaratne, S. D.; Dhungana, G. P.; Dianatinasab, M.; Diaz, D.; Dibaji  
347 Forooshani, Z. S.; Dingels, Z. V.; Dirac, M. A.; Djalalinia, S.; Do, H. T.; Dokova, K.;

348 Dorostkar, F.; Doshi, C. P.; Doshmangir, L.; Douiri, A.; Doxey, M. C.; Driscoll, T. R.;  
349 Dunachie, S. J.; Duncan, B. B.; Duraes, A. R.; Eagan, A. W.; Ebrahimi Kalan, M.;  
350 Edvardsson, D.; Ehrlich, J. R.; El Nahas, N.; El Sayed, I.; El Tantawi, M.; Elbarazi, I.;  
351 Elgendy, I. Y.; Elhabashy, H. R.; El-Jaafary, S. I.; Elyazar, I. R.; Emamian, M. H.; Emmons-  
352 Bell, S.; Erskine, H. E.; Eshrati, B.; Eskandarieh, S.; Esmaeilnejad, S.; Esmaeilzadeh, F.;  
353 Esteghamati, A.; Estep, K.; Etemadi, A.; Etisso, A. E.; Farahmand, M.; Faraj, A.; Fareed,  
354 M.; Faridnia, R.; Farinha, C. S. e S.; Farioli, A.; Faro, A.; Faruque, M.; Farzadfar, F.;  
355 Fattahi, N.; Fazlzadeh, M.; Feigin, V. L.; Feldman, R.; Fereshtehnejad, S.-M.; Fernandes,  
356 E.; Ferrari, A. J.; Ferreira, M. L.; Filip, I.; Fischer, F.; Fisher, J. L.; Fitzgerald, R.; Flohr, C.;  
357 Flor, L. S.; Foigt, N. A.; Folayan, M. O.; Force, L. M.; Fornari, C.; Foroutan, M.; Fox, J. T.;  
358 Freitas, M.; Fu, W.; Fukumoto, T.; Furtado, J. M.; Gad, M. M.; Gakidou, E.; Galles, N. C.;  
359 Gallus, S.; Gamkrelidze, A.; Garcia-Basteiro, A. L.; Gardner, W. M.; Geberemariam, B. S.;  
360 Gebrehiwot, A. M.; Gebremedhin, K. B.; Gebreslassie, A. A. A. A.; Gershberg Hayoon, A.;  
361 Gething, P. W.; Ghadimi, M.; Ghadiri, K.; Ghafourifard, M.; Ghajar, A.; Ghamari, F.;  
362 Ghashghaee, A.; Ghiasvand, H.; Ghith, N.; Gholamian, A.; Gilani, S. A.; Gill, P. S.;  
363 Gitimoghaddam, M.; Giussani, G.; Goli, S.; Gomez, R. S.; Gopalani, S. V.; Gorini, G.;  
364 Gorman, T. M.; Gottlich, H. C.; Goudarzi, H.; Goulart, A. C.; Goulart, B. N. G.; Grada, A.;  
365 Grivna, M.; Grosso, G.; Gubari, M. I. M.; Gugnani, H. C.; Guimaraes, A. L. S.; Guimarães,  
366 R. A.; Guled, R. A.; Guo, G.; Guo, Y.; Gupta, R.; Haagsma, J. A.; Haddock, B.; Hafezi-  
367 Nejad, N.; Hafiz, A.; Hagins, H.; Haile, L. M.; Hall, B. J.; Halvaei, I.; Hamadeh, R. R.;  
368 Hamagharib Abdullah, K.; Hamilton, E. B.; Han, C.; Han, H.; Hankey, G. J.; Haro, J. M.;  
369 Harvey, J. D.; Hasaballah, A. I.; Hasanzadeh, A.; Hashemian, M.; Hassanipour, S.;  
370 Hassankhani, H.; Havmoeller, R. J.; Hay, R. J.; Hay, S. I.; Hayat, K.; Heidari, B.; Heidari,  
371 G.; Heidari-Soureshjani, R.; Hendrie, D.; Henrikson, H. J.; Henry, N. J.; Herteliu, C.;  
372 Heydarpour, F.; Hird, T. R.; Hoek, H. W.; Hole, M. K.; Holla, R.; Hoogar, P.; Hosgood, H.  
373 D.; Hosseinzadeh, M.; Hostiuc, M.; Hostiuc, S.; Househ, M.; Hoy, D. G.; Hsairi, M.; Hsieh,  
374 V. C.; Hu, G.; Huda, T. M.; Hugo, F. N.; Huynh, C. K.; Hwang, B.-F.; Iannucci, V. C.;  
375 Ibitoye, S. E.; Ikuta, K. S.; Ilesanmi, O. S.; Ilic, I. M.; Ilic, M. D.; Inbaraj, L. R.; Ippolito, H.;  
376 Irvani, S. S. N.; Islam, M. M.; Islam, M.; Islam, S. M. S.; Islami, F.; Iso, H.; Ivers, R. Q.; Iwu,  
377 C. C. D.; Iyamu, I. O.; Jaafari, J.; Jacobsen, K. H.; Jadidi-Niaragh, F.; Jafari, H.; Jafarinia,  
378 M.; Jahagirdar, D.; Jahani, M. A.; Jahanmehr, N.; Jakovljevic, M.; Jalali, A.; Jalilian, F.;  
379 James, S. L.; Janjani, H.; Janodia, M. D.; Jayatilleke, A. U.; Jeemon, P.; Jenabi, E.; Jha, R.  
380 P.; Jha, V.; Ji, J. S.; Jia, P.; John, O.; John-Akinola, Y. O.; Johnson, C. O.; Johnson, S. C.;  
381 Jonas, J. B.; Joo, T.; Joshi, A.; Jozwiak, J. J.; Jürisson, M.; Kabir, A.; Kabir, Z.; Kalani, H.;  
382 Kalani, R.; Kalankesh, L. R.; Kalhor, R.; Kamiab, Z.; Kanchan, T.; Karami Matin, B.; Karch,  
383 A.; Karim, M. A.; Karimi, S. E.; Kassa, G. M.; Kassebaum, N. J.; Katikireddi, S. V.;  
384 Kawakami, N.; Kayode, G. A.; Keddie, S. H.; Keller, C.; Kereselidze, M.; Khafaie, M. A.;  
385 Khalid, N.; Khan, M.; Khatab, K.; Khater, M. M.; Khatib, M. N.; Khayamzadeh, M.;  
386 Khodayari, M. T.; Khundkar, R.; Kianipour, N.; Kielsing, C.; Kim, D.; Kim, Y.-E.; Kim, Y. J.;  
387 Kimokoti, R. W.; Kisa, A.; Kisa, S.; Kissimova-Skarbek, K.; Kivimäki, M.; Kneib, C. J.;  
388 Knudsen, A. K. S.; Kocarnik, J. M.; Kolola, T.; Kopec, J. A.; Kosen, S.; Koul, P. A.;  
389 Koyanagi, A.; Kravchenko, M. A.; Krishan, K.; Krohn, K. J.; Kuate Defo, B.; Kucuk Bicer,  
390 B.; Kumar, G. A.; Kumar, M.; Kumar, P.; Kumar, V.; Kumares, G.; Kurmi, O. P.; Kusuma,  
391 D.; Kyu, H. H.; La Vecchia, C.; Lacey, B.; Lal, D. K.; Laloo, R.; Lam, J. O.; Lami, F. H.;  
392 Landires, I.; Lang, J. J.; Lansingh, V. C.; Larson, S. L.; Larsson, A. O.; Lasrado, S.; Lassi,  
393 Z. S.; Lau, K. M.-M.; Lavados, P. M.; Lazarus, J. V.; Ledesma, J. R.; Lee, P. H.; Lee, S. W.  
394 H.; LeGrand, K. E.; Leigh, J.; Leonardi, M.; Lescinsky, H.; Leung, J.; Levi, M.; Lewington,  
395 S.; Li, S.; Lim, L.-L.; Lin, C.; Lin, R.-T.; Linehan, C.; Linn, S.; Liu, H.-C.; Liu, S.; Liu, Z.;  
396 Looker, K. J.; Lopez, A. D.; Lopukhov, P. D.; Lorkowski, S.; Lotufo, P. A.; Lucas, T. C. D.;  
397 Lugo, A.; Lunevicius, R.; Lyons, R. A.; Ma, J.; MacLachlan, J. H.; Maddison, E. R.;  
398 Maddison, R.; Madotto, F.; Mahasha, P. W.; Mai, H. T.; Majeed, A.; Maled, V.; Maleki, S.;



399 Malekzadeh, R.; Malta, D. C.; Mamun, A. A.; Manafi, A.; Manafi, N.; Manguerra, H.;  
400 Mansouri, B.; Mansournia, M. A.; Mantilla Herrera, A. M.; Maravilla, J. C.; Marks, A.;  
401 Martins-Melo, F. R.; Martopullo, I.; Masoumi, S. Z.; Massano, J.; Massenburg, B. B.;  
402 Mathur, M. R.; Maulik, P. K.; McAlinden, C.; McGrath, J. J.; McKee, M.; Mehndiratta, M.  
403 M.; Mehri, F.; Mehta, K. M.; Meitei, W. B.; Memiah, P. T. N.; Mendoza, W.; Menezes, R.  
404 G.; Mengesha, E. W.; Mengesha, M. B.; Mereke, A.; Meretoja, A.; Meretoja, T. J.;  
405 Mestrovic, T.; Miazgowski, B.; Miazgowski, T.; Michalek, I. M.; Mihretie, K. M.; Miller, T. R.;  
406 Mills, E. J.; Mirica, A.; Mirrakhimov, E. M.; Mirzaei, H.; Mirzaei, M.; Mirzaei-Alavijeh, M.;  
407 Misganaw, A. T.; Mithra, P.; Moazen, B.; Moghadaszadeh, M.; Mohamadi, E.; Mohammad,  
408 D. K.; Mohammad, Y.; Mohammad Gholi Mezerji, N.; Mohammadian-Hafshejani, A.;  
409 Mohammadifard, N.; Mohammadpourhodki, R.; Mohammed, S.; Mokdad, A. H.; Molokhia,  
410 M.; Momen, N. C.; Monasta, L.; Mondello, S.; Mooney, M. D.; Moosazadeh, M.; Moradi, G.;  
411 Moradi, M.; Moradi-Lakeh, M.; Moradzadeh, R.; Moraga, P.; Morales, L.; Morawska, L.;  
412 Moreno Velásquez, I.; Morgado-da-Costa, J.; Morrison, S. D.; Mosser, J. F.; Mouodi, S.;  
413 Mousavi, S. M.; Mousavi Khaneghah, A.; Mueller, U. O.; Munro, S. B.; Muriithi, M. K.;  
414 Musa, K. I.; Muthupandian, S.; Naderi, M.; Nagarajan, A. J.; Nagel, G.; Naghshtabrizi, B.;  
415 Nair, S.; Nandi, A. K.; Nangia, V.; Nansseu, J. R.; Nayak, V. C.; Nazari, J.; Negoï, I.; Negoï,  
416 R. I.; Netsere, H. B. N.; Ngunjiri, J. W.; Nguyen, C. T.; Nguyen, J.; Nguyen, M.; Nguyen,  
417 M.; Nichols, E.; Nigatu, D.; Nigatu, Y. T.; Nikbakhsh, R.; Nixon, M. R.; Nnaji, C. A.;  
418 Nomura, S.; Norrving, B.; Noubiap, J. J.; Nowak, C.; Nunez-Samudio, V.; Ofoïu, A.;  
419 Oancea, B.; Odell, C. M.; Ogbo, F. A.; Oh, I.-H.; Okunga, E. W.; Oladnabi, M.; Olagunju, A.  
420 T.; Olusanya, B. O.; Olusanya, J. O.; Oluwasanu, M. M.; Omar Bali, A.; Omer, M. O.; Ong,  
421 K. L.; Onwujekwe, O. E.; Orji, A. U.; Orpana, H. M.; Ortiz, A.; Ostroff, S. M.; Otstavnov, N.;  
422 Otstavnov, S. S.; Øverland, S.; Owolabi, M. O.; P A, M.; Padubidri, J. R.; Pakhare, A. P.;  
423 Palladino, R.; Pana, A.; Panda-Jonas, S.; Pandey, A.; Park, E.-K.; Parmar, P. G. K.;  
424 Pasupula, D. K.; Patel, S. K.; Paternina-Caicedo, A. J.; Pathak, A.; Pathak, M.; Patten, S.  
425 B.; Patton, G. C.; Paudel, D.; Pazoki Toroudi, H.; Peden, A. E.; Pennini, A.; Pepito, V. C.  
426 F.; Peprah, E. K.; Pereira, A.; Pereira, D. M.; Perico, N.; Pham, H. Q.; Phillips, M. R.;  
427 Pigott, D. M.; Pilgrim, T.; Pilz, T. M.; Pirsaeheb, M.; Plana-Ripoll, O.; Plass, D.; Pokhrel, K.  
428 N.; Polibin, R. V.; Polinder, S.; Polkinghorne, K. R.; Postma, M. J.; Pourjafar, H.;  
429 Pourmalek, F.; Pourmirza Kalhori, R.; Pourshams, A.; Poznańska, A.; Prada, S. I.;  
430 Prakash, V.; Pribadi, D. R. A.; Pupillo, E.; Quazi Syed, Z.; Rabiee, M.; Rabiee, N.; Radfar,  
431 A.; Rafiee, A.; Rafiei, A.; Raggi, A.; Rahimi-Movaghar, A.; Rahman, M. A.; Rajabpour-  
432 Sanati, A.; Rajati, F.; Ramezanzadeh, K.; Ranabhat, C. L.; Rao, P. C.; Rao, S. J.; Rasella,  
433 D.; Rastogi, P.; Rathi, P.; Rawaf, D. L.; Rawaf, S.; Rawal, L.; Razo, C.; Redford, S. B.;  
434 Reiner, R. C., Jr; Reinig, N.; Reitsma, M. B.; Remuzzi, G.; Renjith, V.; Renzaho, A. M. N.;  
435 Resnikoff, S.; Rezaei, N.; Rezai, M. sadegh; Rezapour, A.; Rhinehart, P.-A.; Riahi, S. M.;  
436 Ribeiro, A. L. P.; Ribeiro, D. C.; Ribeiro, D.; Rickard, J.; Roberts, N. L. S.; Roberts, S.;  
437 Robinson, S. R.; Roever, L.; Rolfe, S.; Ronfani, L.; Roshandel, G.; Roth, G. A.; Rubagotti,  
438 E.; Rumisha, S. F.; Sabour, S.; Sachdev, P. S.; Saddik, B.; Sadeghi, E.; Sadeghi, M.;  
439 Saeidi, S.; Safi, S.; Safiri, S.; Sagar, R.; Sahebkar, A.; Sahraian, M. A.; Sajadi, S. M.;  
440 Salahshoor, M. R.; Salamati, P.; Salehi Zahabi, S.; Salem, H.; Salem, M. R. R.;  
441 Salimzadeh, H.; Salomon, J. A.; Salz, I.; Samad, Z.; Samy, A. M.; Sanabria, J.;  
442 Santomauro, D. F.; Santos, I. S.; Santos, J. V.; Santric-Milicevic, M. M.; Saraswathy, S. Y.  
443 I.; Sarmiento-Suárez, R.; Sarrafzadegan, N.; Sartorius, B.; Sarveazad, A.; Sathian, B.;  
444 Sathish, T.; Sattin, D.; Sbarra, A. N.; Schaeffer, L. E.; Schiavolin, S.; Schmidt, M. I.;  
445 Schutte, A. E.; Schwebel, D. C.; Schwendicke, F.; Senbeta, A. M.; Senthilkumaran, S.;  
446 Sepanlou, S. G.; Shackelford, K. A.; Shadid, J.; Shahabi, S.; Shaheen, A. A.; Shaikh, M.  
447 A.; Shalash, A. S.; Shams-Beyranvand, M.; Shamsizadeh, M.; Shannawaz, M.; Sharafi, K.;  
448 Sharara, F.; Sheena, B. S.; Sheikhtaheri, A.; Shetty, R. S.; Shibuya, K.; Shiferaw, W. S.;  
449 Shigematsu, M.; Shin, J. I.; Shiri, R.; Shirkoohi, R.; Shrimé, M. G.; Shuval, K.; Siabani, S.;

450 Sigfusdottir, I. D.; Sigurvinsdottir, R.; Silva, J. P.; Simpson, K. E.; Singh, A.; Singh, J. A.;  
451 Skiadaresi, E.; Skou, S. T.; Skryabin, V. Y.; Sobngwi, E.; Sokhan, A.; Soltani, S.;  
452 Sorensen, R. J. D.; Soriano, J. B.; Sorrie, M. B.; Soyiri, I. N.; Sreeramareddy, C. T.;  
453 Stanaway, J. D.; Stark, B. A.; Ştefan, S. C.; Stein, C.; Steiner, C.; Steiner, T. J.; Stokes, M.  
454 A.; Stovner, L. J.; Stubbs, J. L.; Sudaryanto, A.; Sufiyan, M. B.; Sulo, G.; Sultan, I.; Sykes,  
455 B. L.; Sylte, D. O.; Szócska, M.; Tabarés-Seisdedos, R.; Tabb, K. M.; Tadakamadla, S. K.;  
456 Taherkhani, A.; Tajdini, M.; Takahashi, K.; Taveira, N.; Teagle, W. L.; Teame, H.; Tehrani-  
457 Banihashemi, A.; Teklehaimanot, B. F.; Terrason, S.; Tessema, Z. T.; Thankappan, K. R.;  
458 Thomson, A. M.; Tohidinik, H. R.; Tonelli, M.; Topor-Madry, R.; Torre, A. E.; Touvier, M.;  
459 Tovani-Palone, M. R. R.; Tran, B. X.; Travillian, R.; Troeger, C. E.; Truelsén, T. C.; Tsai, A.  
460 C.; Tsatsakis, A.; Tudor Car, L.; Tyrovolas, S.; Uddin, R.; Ullah, S.; Undurraga, E. A.;  
461 Unnikrishnan, B.; Vacante, M.; Vakilian, A.; Valdez, P. R.; Varughese, S.; Vasankari, T. J.;  
462 Vasseghian, Y.; Venketasubramanian, N.; Violante, F. S.; Vlassov, V.; Vollset, S. E.;  
463 Vongpradith, A.; Vukovic, A.; Vukovic, R.; Waheed, Y.; Walters, M. K.; Wang, J.; Wang, Y.;  
464 Wang, Y.-P.; Ward, J. L.; Watson, A.; Wei, J.; Weintraub, R. G.; Weiss, D. J.; Weiss, J.;  
465 Westerman, R.; Whisnant, J. L.; Whiteford, H. A.; Wiangkham, T.; Wiens, K. E.; Wijeratne,  
466 T.; Wilner, L. B.; Wilson, S.; Wojtyniak, B.; Wolfe, C. D. A.; Wool, E. E.; Wu, A.-M.; Wulf  
467 Hanson, S.; Wunrow, H. Y.; Xu, G.; Xu, R.; Yadgir, S.; Yahyazadeh Jabbari, S. H.;  
468 Yamagishi, K.; Yaminfirooz, M.; Yano, Y.; Yaya, S.; Yazdi-Feyzabadi, V.; Yearwood, J. A.;  
469 Yeheyis, T. Y.; Yeshitila, Y. G.; Yip, P.; Yonemoto, N.; Yoon, S.-J.; Yoosefi Lebni, J.;  
470 Younis, M. Z.; Younker, T. P.; Yousefi, Z.; Yousefifard, M.; Yousefinezhadi, T.; Yousuf, A.  
471 Y.; Yu, C.; Yusefzadeh, H.; Zahirian Moghadam, T.; Zaki, L.; Zaman, S. B.; Zamani, M.;  
472 Zamanian, M.; Zandian, H.; Zangeneh, A.; Zastrozhin, M. S.; Zewdie, K. A.; Zhang, Y.;  
473 Zhang, Z.-J.; Zhao, J. T.; Zhao, Y.; Zheng, P.; Zhou, M.; Ziapour, A.; Zimsen, S. R. M.;  
474 Naghavi, M.; Murray, C. J. L. Global Burden of 369 Diseases and Injuries in 204 Countries  
475 and Territories, 1990–2019: A Systematic Analysis for the Global Burden of Disease Study  
476 2019. *The Lancet* **2020**, 396 (10258), 1204–1222. [https://doi.org/10.1016/S0140-](https://doi.org/10.1016/S0140-6736(20)30925-9)  
477 [6736\(20\)30925-9](https://doi.org/10.1016/S0140-6736(20)30925-9).  
478 (3) Wang, H.; Bhutta, Z. A.; Coates, M. M.; Coggeshall, M.; Dandona, L.; Diallo, K.; Franca, E.  
479 B.; Fraser, M.; Fullman, N.; Gething, P. W.; Hay, S. I.; Kinfu, Y.; Kita, M.; Kulikoff, X. R.;  
480 Larson, H. J.; Liang, J.; Liang, X.; Lim, S. S.; Lind, M.; Lopez, A. D.; Lozano, R.; Mensah,  
481 G. A.; Mikesell, J. B.; Mokdad, A. H.; Mooney, M. D.; Naghavi, M.; Nguyen, G.; Rakovac,  
482 I.; Salomon, J. A.; Silpakit, N.; Sligar, A.; Sorensen, R. J. D.; Vos, T.; Zhu, J.; Abajobir, A.  
483 A.; Abate, K. H.; Abbas, K. M.; Abd-Allah, F.; Abdulle, A. M.; Abera, S. F.; Aboyans, V.;  
484 Abraham, B.; Abubakar, I.; Abu-Raddad, L. J.; Abu-Rmeileh, N. M. E.; Abyu, G. Y.; Achoki,  
485 T.; Adebisi, A. O.; Adedeji, I. A.; Adelekan, A. L.; Adou, A. K.; Agarwal, A.; Ajala, O. N.;  
486 Akinyemiju, T. F.; Akseer, N.; Alam, K.; Alam, N. K. M.; Alasfoor, D.; Aldridge, R. W.;  
487 Alegretti, M. A.; Alemu, Z. A.; Ali, R.; Alkerwi, A.; Alla, F.; Al-Raddadi, R.; Alsharif, U.;  
488 Altirkawi, K. A.; Martin, E. A.; Alvis-Guzman, N.; Amare, A. T.; Amberbir, A.; Amegah, A.  
489 K.; Ameh, E. A.; Ammar, W.; Amrock, S. M.; Andersen, H. H.; Anderson, G. M.; Antonio, C.  
490 A. T.; Ärnlöv, J.; Artaman, A.; Asayesh, H.; Asghar, R. J.; Assadi, R.; Atique, S.; Avokpaho,  
491 E. F. G. A.; Awasthi, A.; Quintanilla, B. P. A.; Bacha, U.; Badawi, A.; Balakrishnan, K.;  
492 Banerjee, A.; Banigbe, B. F.; Barac, A.; Barber, R. M.; Barker-Collo, S. L.; Bärnighausen,  
493 T.; Barrero, L. H.; Bayou, T. A.; Bayou, Y. T.; Bazargan-Hejazi, S.; Beardsley, J.; Bedi, N.;  
494 Bekele, T.; Bell, M. L.; Bello, A. K.; Bennett, D. A.; Bensenor, I. M.; Berhane, A.; Bernabé,  
495 E.; Betsu, B. D.; Beyene, A. S.; Bhatt, S.; Biadgilign, S.; Bikbov, B.; Birlik, S. M.; Bisanzio,  
496 D.; Bjertness, E.; Blore, J. D.; Bourne, R. R. A.; Brainin, M.; Brazinova, A.; Breitborde, N. J.  
497 K.; Brown, A.; Buckle, G. C.; Burch, M.; Butt, Z. A.; Campos-Nonato, I. R.; Campuzano, J.  
498 C.; Cárdenas, R.; Carpenter, D. O.; Carrero, J. J.; Carter, A.; Casey, D. C.; Castañeda-  
499 Orjuela, C. A.; Rivas, J. C.; Castro, R. E.; Catalá-López, F.; Cercy, K.; Chang, H.-Y.;  
500 Chang, J.-C.; Chibueze, C. E.; Chisumpa, V. H.; Choi, J.-Y. J.; Chowdhury, R.;



501 Christopher, D. J.; Ciobanu, L. G.; Colquhoun, S. M.; Cooper, C.; Cornaby, L.; Damtew, S.  
502 A.; Danawi, H.; Dandona, R.; das Neves, J.; Davis, A. C.; de Jager, P.; De Leo, D.;  
503 Degenhardt, L.; Deribe, K.; Deribew, A.; Jarlais, D. C. D.; deVeber, G. A.; Dharmaratne, S.  
504 D.; Dhillon, P. K.; Ding, E. L.; Doshi, P. P.; Doyle, K. E.; Duan, L.; Dubey, M.; Ebrahimi, H.;  
505 Ellingsen, C. L.; Elyazar, I.; Endries, A. Y.; Ermakov, S. P.; Eshrati, B.; Esteghamati, A.;  
506 Faraon, E. J. A.; Farid, T. A.; Farinha, C. S. e S.; Faro, A.; Farvid, M. S.; Farzadfar, F.;  
507 Fereshtehnejad, S.-M.; Fernandes, J. C.; Fischer, F.; Fitchett, J. R. A.; Foigt, N.; Franklin,  
508 R. C.; Friedman, J.; Fürst, T.; Gambashidze, K.; Gamkrelidze, A.; Ganguly, P.; Gebre, T.;  
509 Gebrehiwot, T. T.; Gebremedhin, A. T.; Gebru, A. A.; Geleijnse, J. M.; Gessner, B. D.;  
510 Ginawi, I. A. M.; Giref, A. Z.; Gishu, M. D.; Gomez-Dantes, H.; Gona, P.; Goodridge, A.;  
511 Gopalani, S. V.; Goto, A.; Gouda, H. N.; Gughani, H. C.; Guo, Y.; Gupta, R.; Gupta, R.;  
512 Gupta, V.; Gyawali, B.; Haagsma, J. A.; Hafezi-Nejad, N.; Haile, D.; Hailu, A. D.; Hailu, G.  
513 B.; Hamadeh, R. R.; Hamidi, S.; Hancock, J.; Handal, A. J.; Hankey, G. J.; Harb, H. L.;  
514 Harikrishnan, S.; Harun, K. M.; Havmoeller, R.; Hay, R. J.; Heredia-Pi, I. B.; Hoek, H. W.;  
515 Horino, M.; Horita, N.; Hosgood, H. D.; Hotez, P. J.; Hoy, D. G.; Hsairi, M.; Hu, G.; Huang,  
516 C.; Huang, J. J.; Huang, H.; Huiart, L.; Huynh, C.; Iburg, K. M.; Idrisov, B. T.; Innos, K.;  
517 Jacobsen, K. H.; Jahanmehr, N.; Javanbakht, M.; Jayatilleke, A. U.; Jee, S. H.; Jeemon,  
518 P.; Jha, V.; Jiang, G.; Jiang, Y.; Jibat, T.; Jin, Y.; Jonas, J. B.; Kabir, Z.; Kalkonde, Y.;  
519 Kamal, R.; Kan, H.; Kang, G.; Karch, A.; Karema, C. K.; Kasaeian, A.; Kaul, A.; Kawakami,  
520 N.; Kayibanda, J. F.; Kazanjan, K.; Keiyoro, P. N.; Kemp, A. H.; Kengne, A. P.; Keren, A.;  
521 Kereselidze, M.; Kesavachandran, C. N.; Khader, Y. S.; Khalil, I. A.; Khan, A. R.; Khan, E.  
522 A.; Khang, Y.-H.; Khonelidze, I.; Khubchandani, J.; Kim, C.; Kim, D.; Kim, Y. J.; Kisson,  
523 N.; Kivipelto, M.; Knibbs, L. D.; Kokubo, Y.; Kosen, S.; Koul, P. A.; Koyanagi, A.; Defo, B.  
524 K.; Bicer, B. K.; Kudom, A. A.; Kumar, G. A.; Kutz, M. J.; Kyu, H. H.; Lal, D. K.; Laloo, R.;  
525 Lam, H.; Lam, J. O.; Lansingh, V. C.; Larsson, A.; Leigh, J.; Leung, R.; Li, Y.; Li, Y.;  
526 Lindsay, M. P.; Liu, P. Y.; Liu, S.; Lloyd, B. K.; Lo, W. D.; Logroscino, G.; Low, N.;  
527 Lunevicius, R.; Lyons, R. A.; Ma, S.; Razek, H. M. A. E.; Razek, M. M. A. E.; Mahdavi, M.;  
528 Majdan, M.; Majeed, A.; Malekzadeh, R.; Mapoma, C. C.; Marcenes, W.; Martinez-Raga,  
529 J.; Marzan, M. B.; Masiye, F.; McGrath, J. J.; Meaney, P. A.; Mehari, A.; Mehndiratta, M.  
530 M.; Mekonnen, A. B.; Melaku, Y. A.; Memiah, P.; Memish, Z. A.; Mendoza, W.; Meretoja,  
531 A.; Meretoja, T. J.; Mhimbira, F. A.; Miller, T. R.; Mills, E. J.; Mirarefin, M.; Misganaw, A.;  
532 Mock, C. N.; Mohammad, K. A.; Mohammadi, A.; Mohammed, S.; Monasta, L.; Hernandez,  
533 J. C. M.; Montico, M.; Moore, A. R.; Moradi-Lakeh, M.; Morawska, L.; Mori, R.; Mueller, U.  
534 O.; Murphy, G. A. V.; Murthy, S.; Nachege, J. B.; Naheed, A.; Naidoo, K. S.; Naldi, L.;  
535 Nand, D.; Nangia, V.; Neupane, S.; Newton, C. R.; Newton, J. N.; Ng, M.; Ngalesoni, F. N.;  
536 Nguhiu, P.; Nguyen, Q. L.; Nisar, M. I.; Pete, P. M. N.; Norheim, O. F.; Norman, R. E.;  
537 Ogbo, F. A.; Oh, I.-H.; Ojelabi, F. A.; Olivares, P. R.; Olusanya, B. O.; Olusanya, J. O.;  
538 Oren, E.; Ota, E.; PA, M.; Park, E.-K.; Park, H.-Y.; Parsaeian, M.; Caicedo, A. J. P.; Patten,  
539 S. B.; Pedro, J. M.; Pereira, D. M.; Perico, N.; Pesudovs, K.; Petzold, M.; Phillips, M. R.;  
540 Pillay, J. D.; Pishgar, F.; Polinder, S.; Pope, D.; Popova, S.; Pourmalek, F.; Qorbani, M.;  
541 Rabiee, R. H. S.; Rafay, A.; Rahimi-Movaghar, V.; Rahman, M.; Rahman, M. H. U.;  
542 Rahman, S. U.; Rai, R. K.; Raju, M.; Ram, U.; Rana, S. M.; Ranabhat, C. L.; Rao, P.;  
543 Refaat, A. H.; Remuzzi, G.; Resnikoff, S.; Reynolds, A.; Rojas-Rueda, D.; Ronfani, L.;  
544 Roshandel, G.; Roth, G. A.; Roy, A.; Ruhago, G. M.; Sagar, R.; Saleh, M. M.; Sanabria, J.  
545 R.; Sanchez-Niño, M. D.; Santos, I. S.; Santos, J. V.; Sarmiento-Suarez, R.; Sartorius, B.;  
546 Satpathy, M.; Savic, M.; Sawhney, M.; Schneider, I. J. C.; Schöttker, B.; Schwebel, D. C.;  
547 Seedat, S.; Sepanlou, S. G.; Servan-Mori, E. E.; Setegn, T.; Shahrzad, S.; Shaikh, M. A.;  
548 Shakh-Nazarova, M.; Sharma, R.; She, J.; Sheikhbahaei, S.; Shen, J.; Sheth, K. N.;  
549 Shibuya, K.; Shin, H. H.; Shin, M.-J.; Shiri, R.; Shui, I.; Sigfusdottir, I. D.; Silva, D. A. S.;  
550 Silverberg, J.; Simard, E. P.; Sindi, S.; Singh, A.; Singh, J. A.; Singh, O. P.; Singh, P. K.;  
551 Singh, V.; Soriano, J. B.; Soshnikov, S.; Sposato, L. A.; Sreeramareddy, C. T.;

- 552 Stathopoulou, V.; Steel, N.; Stroumpoulis, K.; Sturua, L.; Sunguya, B. F.; Swaminathan, S.;  
553 Sykes, B. L.; Szoeki, C. E. I.; Tabarés-Seisdedos, R.; Tavakkoli, M.; Taye, B.; Tedla, B.  
554 A.; Tefera, W. M.; Tekle, T.; Shifa, G. T.; Terkawi, A. S.; Tesfay, F. H.; Tessema, G. A.;  
555 Thapa, K.; Thomson, A. J.; Thorne-Lyman, A. L.; Tobe-Gai, R.; Tonelli, M.; Topor-Madry,  
556 R.; Topouzis, F.; Tran, B. X.; Troeger, C.; Truelsen, T.; Dimbuene, Z. T.; Tura, A. K.;  
557 Tyrovolas, S.; Ukwaja, K. N.; Uneke, C. J.; Uthman, O. A.; Vaezghasemi, M.; Vasankari,  
558 T.; Vasconcelos, A. M. N.; Venketasubramanian, N.; Verma, R. K.; Violante, F. S.;  
559 Vladimirov, S. K.; Vlassov, V. V.; Vollset, S. E.; Wang, L.; Wang, Y.; Weichenthal, S.;  
560 Weiderpass, E.; Weintraub, R. G.; Weiss, D. J.; Werdecker, A.; Westerman, R.;  
561 Widdowson, M.-A.; Wijeratne, T.; Williams, T. N.; Wiysonge, C. S.; Wolfe, C. D. A.; Wolfe,  
562 I.; Won, S.; Wubshet, M.; Xiao, Q.; Xu, G.; Yadav, A. K.; Yakob, B.; Yano, Y.; Yaseri, M.;  
563 Ye, P.; Yebayo, H. G.; Yip, P.; Yonemoto, N.; Yoon, S.-J.; Younis, M. Z.; Yu, C.; Zaidi, Z.;  
564 Zaki, M. E. S.; Zeeb, H.; Zhang, H.; Zhao, Y.; Zheng, Y.; Zhou, M.; Zodpey, S.; Murray, C.  
565 J. L. Global, Regional, National, and Selected Subnational Levels of Stillbirths, Neonatal,  
566 Infant, and under-5 Mortality, 1980–2015: A Systematic Analysis for the Global Burden of  
567 Disease Study 2015. *The Lancet* **2016**, 388 (10053), 1725–1774.  
568 [https://doi.org/10.1016/S0140-6736\(16\)31575-6](https://doi.org/10.1016/S0140-6736(16)31575-6).
- 569 (4) Killerby, M. E.; Biggs, H. M.; Haynes, A.; Dahl, R. M.; Mustaquim, D.; Gerber, S. I.;  
570 Watson, J. T. Human Coronavirus Circulation in the United States 2014–2017. *Journal of*  
571 *Clinical Virology* **2018**, 101, 52–56. <https://doi.org/10.1016/j.jcv.2018.01.019>.
- 572 (5) Olsen, S. J.; Winn, A. K.; Budd, A. P.; Prill, M. M.; Steel, J.; Midgley, C. M.; Kniss, K.;  
573 Burns, E.; Rowe, T.; Foust, A.; Jasso, G.; Merced-Morales, A.; Davis, C. T.; Jang, Y.;  
574 Jones, J.; Daly, P.; Gubareva, L.; Barnes, J.; Kondor, R.; Sessions, W.; Smith, C.;  
575 Wentworth, D. E.; Garg, S.; Havers, F. P.; Fry, A. M.; Hall, A. J.; Brammer, L.; Silk, B. J.  
576 Changes in Influenza and Other Respiratory Virus Activity During the COVID-19 Pandemic  
577 - United States, 2020–2021. *MMWR Morb Mortal Wkly Rep* **2021**, 70 (29), 1013–1019.  
578 <https://doi.org/10.15585/mmwr.mm7029a1>.
- 579 (6) Chow, E. J.; Uyeki, T. M.; Chu, H. Y. The Effects of the COVID-19 Pandemic on  
580 Community Respiratory Virus Activity. *Nature Reviews Microbiology* **2023**, 21 (3), 195–  
581 210. <https://doi.org/10.1038/s41579-022-00807-9>.
- 582 (7) Boehm, A. B.; Hughes, B.; Duong, D.; Chan-Herur, V.; Buchman, A.; Wolfe, M. K.; White,  
583 B. J. Wastewater Concentrations of Human Influenza, Metapneumovirus, Parainfluenza,  
584 Respiratory Syncytial Virus, Rhinovirus, and Seasonal Coronavirus Nucleic-Acids during  
585 the COVID-19 Pandemic: A Surveillance Study. *The Lancet Microbe* **2023**.  
586 [https://doi.org/10.1016/S2666-5247\(22\)00386-X](https://doi.org/10.1016/S2666-5247(22)00386-X).
- 587 (8) Hamid, S.; Winn, A.; Parikh, R.; Jones, J.; McMorro, M.; Prill, M.; Silk, B. J.; Scobie, H.  
588 M.; Hall, A. J. Seasonality of Respiratory Syncytial Virus — United States, 2017–2023.  
589 *MMWR Morb Mortal Wkly Rep* **2023**, 72, 355–361.  
590 <http://dx.doi.org/10.15585/mmwr.mm7214a1>.
- 591 (9) Furlow, B. Triple-Demic Overwhelms Paediatric Units in US Hospitals. *The Lancet Child &*  
592 *Adolescent Health* **2023**, 7 (2), 86. [https://doi.org/10.1016/S2352-4642\(22\)00372-8](https://doi.org/10.1016/S2352-4642(22)00372-8).
- 593 (10) Weixel, N. 'Tripledemic' Infected Nearly 40 Percent of Households, Survey Finds. *The Hill*.  
594 February 7, 2023. [https://thehill.com/policy/healthcare/3846161-tripledemic-infected-](https://thehill.com/policy/healthcare/3846161-tripledemic-infected-nearly-40-percent-of-households-survey-finds/)  
595 [nearly-40-percent-of-households-survey-finds/](https://thehill.com/policy/healthcare/3846161-tripledemic-infected-nearly-40-percent-of-households-survey-finds/) (accessed 2023-05-22).
- 596 (11) Chow, Y. P.; Chin, B. H. Z.; Loo, J. M.; Moorthy, L. R.; Jairaman, J.; Tan, L. H.; Tay, W. W.  
597 Y. Clinical and Epidemiological Characteristics of Patients Seeking COVID-19 Testing in a  
598 Private Centre in Malaysia: Is There a Role for Private Healthcare in Battling the  
599 Outbreak? *PLOS ONE* **2021**, 16 (10), e0258671.  
600 <https://doi.org/10.1371/journal.pone.0258671>.
- 601 (12) Radar, B.; Gertz, A.; Iuliano, A. D.; Gilmer, M.; Wronski, L.; Astley, C. M.; Sewalk, K.;  
602 Varrelman, T.; Cohen, J.; Parikh, R.; Reese, H. E.; Reed, C.; Brownstein, J. S. Use of At-

- 603 Home COVID-19 Tests — United States, August 23, 2021–March 12, 2022. *MMWR Morb*  
604 *Mortal Wkly Rep* **2022**, *71*, 489–494. <http://dx.doi.org/10.15585/mmwr.mm7113e1>.
- 605 (13) McElfish, P. A.; Purvis, R.; James, L. P.; Willis, D. E.; Andersen, J. A. Perceived Barriers to  
606 COVID-19 Testing. *International Journal of Environmental Research and Public Health*  
607 **2021**, *18* (5). <https://doi.org/10.3390/ijerph18052278>.
- 608 (14) Jajosky, R. A.; Groseclose, S. L. Evaluation of Reporting Timeliness of Public Health  
609 Surveillance Systems for Infectious Diseases. *BMC Public Health* **2004**, *4* (1), 29.  
610 <https://doi.org/10.1186/1471-2458-4-29>.
- 611 (15) Simonsen, L.; Gog, J. R.; Olson, D.; Viboud, C. Infectious Disease Surveillance in the Big  
612 Data Era: Towards Faster and Locally Relevant Systems. *The Journal of Infectious*  
613 *Diseases* **2016**, *214* (suppl\_4), S380–S385. <https://doi.org/10.1093/infdis/jiw376>.
- 614 (16) Wolfe, M. K.; Topol, A.; Knudson, A.; Simpson, A.; White, B.; Duc, V.; Yu, A.; Li, L.; Balliet,  
615 M.; Stoddard, P.; Han, G.; Wigginton, K. R.; Boehm, A. High-Frequency, High-Throughput  
616 Quantification of SARS-CoV-2 RNA in Wastewater Settled Solids at Eight Publicly Owned  
617 Treatment Works in Northern California Shows Strong Association with COVID-19  
618 Incidence. *mSystems* **2021**, *6* (5), e00829-21. <https://doi.org/10.1128/mSystems.00829-21>.
- 619 (17) Topol, A.; Wolfe, M.; White, B.; Wigginton, K.; Boehm, A. High Throughput Pre-Analytical  
620 Processing of Wastewater Settled Solids for SARS-CoV-2 RNA Analyses. *protocols.io*  
621 **2021**.
- 622 (18) Topol, A.; Wolfe, M.; Wigginton, K.; White, B.; Boehm, A. High Throughput RNA Extraction  
623 and PCR Inhibitor Removal of Settled Solids for Wastewater Surveillance of SARS-CoV-2  
624 RNA. *protocols.io* **2021**.
- 625 (19) Huisman, J. S.; Scire, J.; Caduff, L.; Fernandez-Cassi, X.; Ganesanandamoorthy, P.; Kull,  
626 A.; Scheidegger, A.; Stachler, E.; Boehm, A. B.; Hughes, B.; Knudson, A.; Topol, A.;  
627 Wigginton, K. R.; Wolfe, M. K.; Kohn, T.; Ort, C.; Stadler, T.; Julian, T. R. Wastewater-  
628 Based Estimation of the Effective Reproductive Number of SARS-CoV-2. *Environmental*  
629 *Health Perspectives* **2022**, *130* (5), 057011–1.
- 630 (20) Symonds, E. M.; Nguyen, K. H.; Harwood, V. J.; Breitbart, M. Pepper Mild Mottle Virus: A  
631 Plant Pathogen with a Greater Purpose in (Waste)Water Treatment Development and  
632 Public Health Management. *Water Research* **2018**, *144*, 1–12.  
633 <https://doi.org/10.1016/j.watres.2018.06.066>.
- 634 (21) Simpson, A.; Topol, A.; White, B.; Wolfe, M. K.; Wigginton, K.; Boehm, A. B. Effect of  
635 Storage Conditions on SARS-CoV-2 RNA Quantification in Wastewater Solids. *PeerJ*  
636 **2021**, *9*, e11933. <https://doi.org/10.7717/peerj.11933>.
- 637 (22) California Influenza Surveillance Program. *Influenza and Other Respiratory Viruses*  
638 *Weekly Report*; 2023.  
639 [https://www.cdph.ca.gov/Programs/CID/DCDC/CDPH%20Document%20Library/Immunizat](https://www.cdph.ca.gov/Programs/CID/DCDC/CDPH%20Document%20Library/Immunization/Week2021-2245_FINALReport.pdf)  
640 [ion/Week2021-2245\\_FINALReport.pdf](https://www.cdph.ca.gov/Programs/CID/DCDC/CDPH%20Document%20Library/Immunization/Week2021-2245_FINALReport.pdf) (accessed 2023-06-08).
- 641 (23) Boehm, A. B.; Wolfe, M. K.; Wigginton, K. R.; Bidwell, A.; White, B. J.; Hughes, B.; Duong;  
642 Chan-Herur, V.; Bischel, H. N.; Naughton, C. C. Human Viral Nucleic Acids Concentrations  
643 in Wastewater Solids from Central and Coastal California, USA. *Scientific Data* **2023**,  
644 Accepted.
- 645 (24) Borchardt, M. A.; Boehm, A. B.; Salit, M.; Spencer, S. K.; Wigginton, K. R.; Noble, R. T.  
646 The Environmental Microbiology Minimum Information (EMMI) Guidelines: QPCR and  
647 DPCR Quality and Reporting for Environmental Microbiology. *Environ. Sci. Technol.* **2021**,  
648 *55* (15), 10210–10223. <https://doi.org/10.1021/acs.est.1c01767>.
- 649 (25) van den Hoogen, B. G.; de Jong, J. C.; Groen, J.; Kuiken, T.; de Groot, R.; Fouchier, R. A.;  
650 Osterhaus, A. D. A Newly Discovered Human Pneumovirus Isolated from Young Children  
651 with Respiratory Tract Disease. *Nat Med* **2001**, *7* (6), 719–724.  
652 <https://doi.org/10.1038/89098>.
- 653 (26) VAN DEN HOOGEN, B. G.; OSTERHAUS, D. M. E.; FOUCHIER, R. A. M. Clinical Impact

- 654 and Diagnosis of Human Metapneumovirus Infection. *The Pediatric Infectious Disease*  
655 *Journal* **2004**, 23 (1).
- 656 (27) Edwards, K. M.; Zhu, Y.; Griffin, M. R.; Weinberg, G. A.; Hall, C. B.; Szilagyi, P. G.; Staat,  
657 M. A.; Iwane, M.; Prill, M. M.; Williams, J. V. Burden of Human Metapneumovirus Infection  
658 in Young Children. *N Engl J Med* **2013**, 368 (7), 633–643.  
659 <https://doi.org/10.1056/NEJMoa1204630>.
- 660 (28) Wei, C.-J.; Crank, M. C.; Shiver, J.; Graham, B. S.; Mascola, J. R.; Nabel, G. J. Next-  
661 Generation Influenza Vaccines: Opportunities and Challenges. *Nature Reviews Drug*  
662 *Discovery* **2020**, 19 (4), 239–252. <https://doi.org/10.1038/s41573-019-0056-x>.
- 663 (29) Mejias, A.; Rodríguez-Fernández, R.; Oliva, S.; Peeples, M. E.; Ramilo, O. The Journey to  
664 a Respiratory Syncytial Virus Vaccine. *Annals of Allergy, Asthma & Immunology* **2020**, 125  
665 (1), 36–46. <https://doi.org/10.1016/j.anai.2020.03.017>.
- 666 (30) US FDA. FDA Approves First Respiratory Syncytial Virus (RSV) Vaccine.  
667 [https://www.fda.gov/news-events/press-announcements/fda-approves-first-respiratory-](https://www.fda.gov/news-events/press-announcements/fda-approves-first-respiratory-syncytial-virus-rsv-vaccine)  
668 [syncytial-virus-rsv-vaccine](https://www.fda.gov/news-events/press-announcements/fda-approves-first-respiratory-syncytial-virus-rsv-vaccine) (accessed 2023-06-08).
- 669 (31) Center for Disease Control. Human metapneumovirus. [https://www.cdc.gov/ncird/human-](https://www.cdc.gov/ncird/human-metapneumovirus.html)  
670 [metapneumovirus.html](https://www.cdc.gov/ncird/human-metapneumovirus.html) (accessed 2023-05-23).
- 671 (32) Li, Y.; Reeves, R. M.; Wang, X.; Bassat, Q.; Brooks, W. A.; Cohen, C.; Moore, D. P.;  
672 Nunes, M.; Rath, B.; Campbell, H.; Nair, H.; Acacio, S.; Alonso, W. J.; Antonio, M.; Ayora  
673 Talavera, G.; Badarch, D.; Baillie, V. L.; Barrera-Badillo, G.; Bigogo, G.; Broor, S.; Bruden,  
674 D.; Buchy, P.; Byass, P.; Chipeta, J.; Clara, W.; Dang, D.-A.; de Freitas Lázaro Emediato,  
675 C. C.; de Jong, M.; Díaz-Quinonez, J. A.; Do, L. A. H.; Fasce, R. A.; Feng, L.; Ferson, M.  
676 J.; Gentile, A.; Gessner, B. D.; Goswami, D.; Goyet, S.; Grijalva, C. G.; Halasa, N.;  
677 Hellferscee, O.; Hessong, D.; Homaira, N.; Jara, J.; Kahn, K.; Khuri-Bulos, N.; Kotloff, K.  
678 L.; Lanata, C. F.; Lopez, O.; Lopez Bolaños, M. R.; Lucero, M. G.; Lucion, F.; Lupisan, S.  
679 P.; Madhi, S. A.; Mekgoe, O.; Moraleda, C.; Moyes, J.; Mulholland, K.; Munywoki, P. K.;  
680 Naby, F.; Nguyen, T. H.; Nicol, M. P.; Nokes, D. J.; Noyola, D. E.; Onozuka, D.; Palani, N.;  
681 Poovorawan, Y.; Rahman, M.; Ramaekers, K.; Romero, C.; Schlaudecker, E. P.;  
682 Schweiger, B.; Seidenberg, P.; Simoes, E. A. F.; Singleton, R.; Sistla, S.; Sturm-Ramirez,  
683 K.; Suntronwong, N.; Sutanto, A.; Tapia, M. D.; Thamthitawat, S.; Thongpan, I.;  
684 Tillekeratne, G.; Tinoco, Y. O.; Treurnicht, F. K.; Turner, C.; Turner, P.; van Doorn, R.; Van  
685 Ranst, M.; Visseaux, B.; Waicharoen, S.; Wang, J.; Yoshida, L.-M.; Zar, H. J. Global  
686 Patterns in Monthly Activity of Influenza Virus, Respiratory Syncytial Virus, Parainfluenza  
687 Virus, and Metapneumovirus: A Systematic Analysis. *The Lancet Global Health* **2019**, 7  
688 (8), e1031–e1045. [https://doi.org/10.1016/S2214-109X\(19\)30264-5](https://doi.org/10.1016/S2214-109X(19)30264-5).
- 689 (33) Boehm, A. B.; Wolfe, M. K.; White, B. J.; Hughes, B.; Duong, D. Divergence of Wastewater  
690 SARS-CoV-2 and Reported Laboratory-Confirmed COVID-19 Incident Case Data  
691 Coincident with Wide-Spread Availability of at-Home COVID-19 Antigen Tests. *PeerJ*  
692 **2023**, Accepted.
- 693 (34) Wolfe, M. K.; Yu, A. T.; Duong, D.; Rane, M. S.; Hughes, B.; Chan-Herur, V.; Donnelly, M.;  
694 Chai, S.; White, B. J.; Vugia, D. J.; Boehm, A. B. Use of Wastewater for Mpox Outbreak  
695 Surveillance in California. *N Engl J Med* **2023**. <https://doi.org/10.1056/NEJMc2213882>.
- 696  
697  
698  
699  
700  
701  
702  
703



704  
705  
706  
707  
708  
709

Table 1. Date of onset and offset, as well as peak of wastewater events for each human viral target measured in wastewater solids for each of 8 POTWs. A “?” indicates that the offset had not yet occurred during the study period. Dates for two events are provided if two wastewater events were identified. SC2 is SARS-CoV-2, only the peak is provided for SC2.

| POTW  | HMPV                           |          | IAV                                  |        | RSV                |        | SC2    |
|-------|--------------------------------|----------|--------------------------------------|--------|--------------------|--------|--------|
|       | onset/offset                   | peak     | onset/offset                         | peak   | onset/offset       | peak   | peak   |
| Gil   | 3 Dec - ?                      | 3 Jan    | 13 Nov - 25 Jan                      | 30 Nov | 24 Oct - 20 Mar    | 30 Nov | 1 Dec  |
| SJ    | 30 Oct - ?                     | 22 March | 14 July - 23 July<br>8 Nov - 3 Mar   | 30 Nov | 17 Sept - 18 April | 20 Dec | 1 Dec  |
| PA    | 1 Nov - ?                      | 26 Nov   | 14 July - 21 Sept<br>11 Nov - 13 Feb | 26 Nov | 11 Oct - 2 April   | 25 Nov | 30 Nov |
| SVCW  | 12 Nov - ?                     | 6 Dec    | 4 Nov - 24 Feb                       | 9 Dec  | 23 Sept - 25 April | 13 Dec | 4 Mar  |
| SE    | 1 Sept - 24 Sept<br>13 Oct - ? | 1 April  | 26 Oct - 25 Feb                      | 8 Dec  | 6 Oct - 25 Mar     | 29 Nov | 5 Jan  |
| Ocean | 6 Aug - ?                      | 30 March | 18 Nov - 22 Feb                      | 13 Dec | 23 Sept - 17 April | 4 Dec  | 16 Mar |
| SAC   | 10 Nov - ?                     | 13 March | 4 Nov - 30 Jan                       | 24 Nov | 19 Oct - 27 Mar    | 14 Dec | 7 Dec  |
| Sun   | 4 Nov - ?                      | 2 March  | 10 Nov - 1 Mar                       | 2 Dec  | 26 Sept - 29 April | 3 Dec  | 9 Feb  |

710

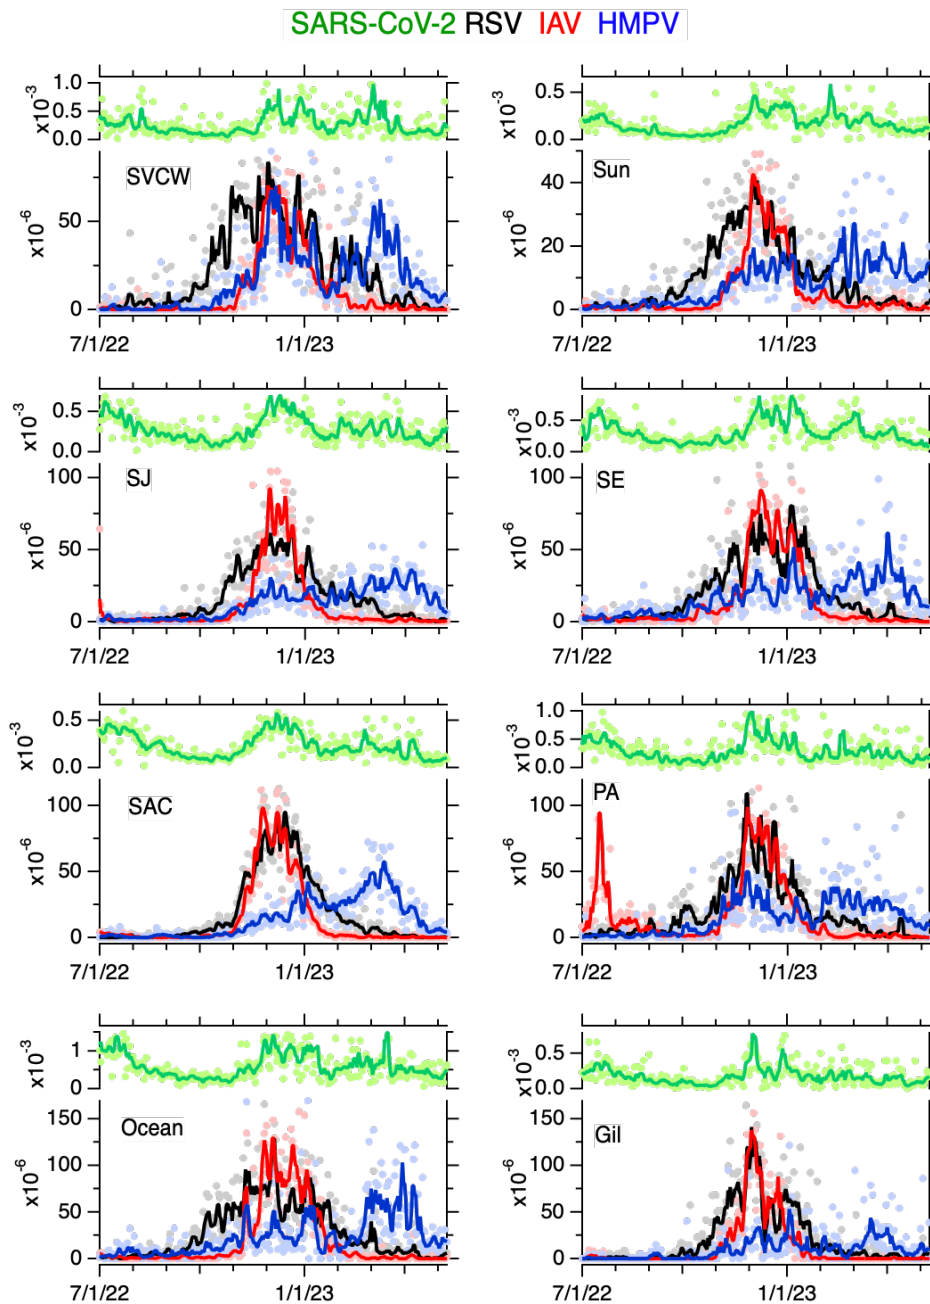

711  
712 Figure 1. Time series of concentrations of SARS-CoV-2, RSV, IAV, and HMPV normalized by  
713 PMMoV in wastewater solids at eight POTWs between 7/1/22 and 5/7/23; the ratio is unitless.  
714 Raw data are shown as filled circles, lines are 5-d trimmed averages. Note the difference in  
715 scale between the SARS-CoV-2 (upper left axis of each panel) and the other viruses (lower left  
716 axis of each panel). The acronym for each POTW is provided in the upper left corner.  
717

1 Supporting information for

2

3 Community occurrence of metapneumovirus, influenza A, and respiratory syncytial virus (RSV)  
4 inferred from wastewater solids during the winter 2022-2023 tripledemic

5

6 **Authors**

7 Alexandria B. Boehm<sup>1\*</sup>, Marlene K. Wolfe<sup>2</sup>, Bradley White<sup>3</sup>, Bridgette Hughes<sup>3</sup>, Dorothea Duong<sup>3</sup>,  
8 Amanda Bidwell<sup>1</sup>

9

10

11 **Affiliations**

12 1. Department of Civil & Environmental Engineering, School of Engineering and Doerr School of  
13 Sustainability, Stanford University, Stanford, CA, USA

14 2. Gangarosa Department of Environmental Health, Rollins School of Public Health, Emory  
15 University, Atlanta, GA, USA

16 3. Verily Life Sciences, South San Francisco, CA, USA

17

18

19

20 \*corresponding author: Alexandria Boehm (aboehm@stanford.edu)

21

22

23

24 **Number of pages: 13**

25 **Number of Tables: 3**

26 **Number of Figures: 6**

27

28

29

30

31  
32  
33  
34  
35  
36  
37  
38  
39  
40  
41  
42  
43  
44  
45  
46  
47  
48  
49  
50  
51  
52  
53  
54  
55  
56  
57  
58  
59  
60  
61  
62  
63  
64  
65  
66  
67  
68  
69  
70  
71  
72  
73  
74

**Additional details of sample collection.** At seven of the eight POTWs, settled solids were collected from the primary clarifier. Settled solids samples were grab samples except for at SJ where staff collected a 24-h composite sample<sup>1</sup>. At Gil, solids were settled from a 24-h composite influent sample using standard method 160.5<sup>2</sup>.

**Additional details of sample processing and nucleic-acid extraction.** Briefly, solids were dewatered by centrifugation, and an aliquot of dewatered solids was dried to determine its dry weight, and another aliquot was resuspended in the bovine coronavirus (BCoV)-spiked DNA/RNA shield (Zymo Research) at a concentration of 75 mg/ml. Bovine coronavirus (BCoV) was used as a positive recovery control. This concentration of solids was chosen as previous work titrated solutions with various concentrations of solids to identify a concentration that minimized inhibition while maintaining sensitivity of the assays<sup>3,4</sup>. The suspension was homogenized, and then centrifuged. The supernatant was subjected to nucleic acid extraction.

**Additional details of digital droplet RT-PCR.** Digital droplet PCR was performed on 20- $\mu$ l samples from a 22- $\mu$ l reaction volume, prepared using 5.5- $\mu$ l template, mixed with 5.5  $\mu$ l of One-Step RT-ddPCR Advanced kit for Probes (catalog no. 1863021; Bio-Rad), 2.2  $\mu$ l reverse transcriptase, 1.1  $\mu$ l dithiothreitol (DTT), and primers and probes at a final concentration of 900 nM and 250 nM, respectively. Droplets were generated using the AutoDG Automated Droplet Generator (Bio-Rad). PCR was performed using Mastercycler Pro with the following protocol: reverse transcription at 50°C for 60 min, enzyme activation at 95°C for 5 min, 40 cycles with 1 cycle consisting of denaturation at 95°C for 30 s and annealing and extension at either 59°C or 61°C (for human viruses) or 56°C (for PMMoV/BCoV duplex assay) for 30 s, enzyme deactivation at 98°C for 10 min, and then an indefinite hold at 4°C. The ramp rate for temperature changes was set at 2°C/s, and the final hold at 4°C was performed for a minimum of 30 min to allow the droplets to stabilize.

All samples were processed for HMPV in multiplex as described in the Data Descriptor by Boehm et al.<sup>4</sup>. For the remaining human viral assay, samples collected between 7/1/22 and 3/11/23, were processed in multiplex as described in the Data Descriptor by Boehm et al.<sup>4</sup> Thereafter, for all samples collected between 3/12/23 and 5/7/23 (month/day/year format), assays for SARS-CoV-2 N gene (FAM), RSV (Cy5), and IAV (Cy5.5) were multiplexed using the probe mixing method; the multiplex assay also contained assays for influenza B and norovirus GII for which results are not presented herein. This assay was run at an annealing temperature of 61°C. BCoV and PMMoV were run in a duplex assay.

Each sample was run in 10 replicate wells. On each 96 well plate, extraction-negative controls were run in 3 wells, and extraction-positive controls in 1 well. PCR-positive controls of SARS-CoV-2, IAV, RSV, HMPV, BCoV, and PMMoV were run in 1 well, and no-template controls (NTC) were run in 3 wells. Positive controls consisted of BCoV and PMMoV gene block controls and the same human virus controls described in the main text as positive extraction controls. Results from replicate wells were merged for analysis.



75  
76 Droplets were analyzed using the QX200 or QX600 Droplet Reader (Bio-Rad). Each sample  
77 was run in 10 replicate wells on 96 well plates that also contained positive and negative  
78 extraction and PCR controls (see SI). Thresholding was done using QuantaSoft Analysis Pro  
79 software (Bio-Rad, version 1.0.596). In order for a sample to be recorded as positive, it had to  
80 have at least three positive droplets. Three positive droplets corresponds to a concentration  
81 between ~500 and 1000 copies (cp)/g dry weight; the range in values is a result of the range in  
82 the equivalent mass of dry solids added to the wells. Any plates for which negative controls  
83 were positive or positive controls were negative were discarded and the samples re-processed  
84 and rerun.

85  
86 **IAV subtype assay design and testing.** To design the primers and probes, influenza A  
87 genome sequences were downloaded from NCBI in January 2023 and aligned to identify  
88 conserved regions in the specified regions of the genome. Then primers and probes targeting  
89 those conserved regions were developed in silico using Primer3Plus (<https://primer3plus.com/>)  
90 (Table S2).

91  
92 Primers and probes were then screened for specificity in silico, and in vitro against other  
93 respiratory and enteric viruses. including adenoviruses, coronaviruses, metapneumovirus,  
94 parainfluenza, RSV, coxsackievirus, echovirus, parechovirus (NATrol Respiratory Verification  
95 Panel NATRVP2.1-BIO and NATrol EV Panel NATEVP-C viral panels, Zeptometrix, Buffalo,  
96 NY), as well as synthetic genomic RNA from influenza A H1N1 and influenza A H3N2 (Twist  
97 Bioscience, South San Francisco, CA).

98  
99 **Measuring IAV subtype markers in wastewater solids.** RNA extracts from the two POTWs  
100 (SJ and Ocean) were stored at -80°C for 1-5 months. RNA was subjected to a single freeze-  
101 thaw and used as template undiluted in digital droplet PCR using the same methods outlined  
102 above. Assays were run in multiplex using the probe mixing approach. H1 and N1 were  
103 multiplexed in the HEX and Cy5.5 channels, respectively. H3, N2, and IAV were multiplexed in  
104 the HEX, FAM/HEX, and ROX channels. Ten replicates were run for each sample, for each  
105 sample with the same number of positive and negative extraction and PCR controls per plate as  
106 described for the prospective measurements described in the main text. Positive controls  
107 consisted of synthetic genomic RNA from influenza H1N1 and H3N2 (Twist). Results are  
108 reported as copies per gram dry weight.

109  
110 **Correlations between wastewater and clinical positivity rates.** IAV in wastewater solids  
111 was significantly associated with state-aggregated weekly clinical specimen influenza positivity  
112 rates at all POTWs (tau between 0.54 and 0.73, all  $p < 10^{-6}$ ) except for SVCW and Sun where the  
113 association was not statistically significant. Weekly median normalized RSV in wastewater  
114 solids was significantly associated with state-aggregated weekly clinical specimen RSV

115 positivity rates at all plants (tau between 0.59 and 0.67, all  $p < 10^{-7}$ ). Weekly median normalized  
116 HMPV in wastewater solids was significantly associated with state-aggregated weekly clinical  
117 specimen HMPV positivity rates at all plants (tau between 0.52 and 0.72,  $p < 10^{-6}$ ). Daily  
118 normalized SARS-CoV-2 was positively associated with daily state-aggregated COVID-19  
119 positivity rates (tau between 0.27 and 0.48, all  $p < 10^{-11}$ ), as has been shown extensively in  
120 previous work.<sup>1,5</sup>

121

## 122 **References**

123

- 124 (1) Wolfe, M. K.; Topol, A.; Knudson, A.; Simpson, A.; White, B.; Duc, V.; Yu, A.; Li, L.; Balliet,  
125 M.; Stoddard, P.; Han, G.; Wigginton, K. R.; Boehm, A. High-Frequency, High-Throughput  
126 Quantification of SARS-CoV-2 RNA in Wastewater Settled Solids at Eight Publicly Owned  
127 Treatment Works in Northern California Shows Strong Association with COVID-19  
128 Incidence. *mSystems* **2021**, 6 (5), e00829-21. <https://doi.org/10.1128/mSystems.00829-21>.
- 129 (2) AWWA. *Standard Methods for the Examination of Water and Wastewater*, 21st ed.; Eaton,  
130 A. D., Clesceri, L. S., Rice, E. W., Greenberg, A. E., Series Eds.; American Public Health  
131 Association, American Water Works Association, Water Environment Federation: Baltimore,  
132 2005.
- 133 (3) Huisman, J. S.; Scire, J.; Caduff, L.; Fernandez-Cassi, X.; Ganesanandamoorthy, P.; Kull,  
134 A.; Scheidegger, A.; Stachler, E.; Boehm, A. B.; Hughes, B.; Knudson, A.; Topol, A.;  
135 Wigginton, K. R.; Wolfe, M. K.; Kohn, T.; Ort, C.; Stadler, T.; Julian, T. R. Wastewater-  
136 Based Estimation of the Effective Reproductive Number of SARS-CoV-2. *Environmental*  
137 *Health Perspectives* **2022**, 130 (5), 057011–1.
- 138 (4) Boehm, A. B.; Wolfe, M. K.; Wigginton, K. R.; Bidwell, A.; White, B. J.; Hughes, B.; Duong;  
139 Chan-Herur, V.; Bischel, H. N.; Naughton, C. C. Human Viral Nucleic Acids Concentrations  
140 in Wastewater Solids from Central and Coastal California, USA. *Scientific Data* **2023**,  
141 Accepted.
- 142 (5) Duvall, C.; Wu, F.; McElroy, K. A.; Imakaev, M.; Endo, N.; Xiao, A.; Zhang, J.; Floyd-  
143 O'Sullivan, R.; Powell, M. M.; Mendola, S.; Wilson, S. T.; Cruz, F.; Melman, T.;  
144 Sathyanarayana, C. L.; Olesen, S. W.; Erickson, T. B.; Ghaeli, N.; Chai, P.; Alm, E. J.;  
145 Matus, M. Nationwide Trends in COVID-19 Cases and SARS-CoV-2 RNA Wastewater  
146 Concentrations in the United States. *ACS EST Water* **2022**, 2 (11), 1899–1909.  
147 <https://doi.org/10.1021/acsestwater.1c00434>.
- 148 (6) Borchardt, M. A.; Boehm, A. B.; Salit, M.; Spencer, S. K.; Wigginton, K. R.; Noble, R. T. The  
149 Environmental Microbiology Minimum Information (EMMI) Guidelines: QPCR and DPCR  
150 Quality and Reporting for Environmental Microbiology. *Environ. Sci. Technol.* **2021**, 55 (15),  
151 10210–10223. <https://doi.org/10.1021/acs.est.1c01767>.

152

153  
154  
155

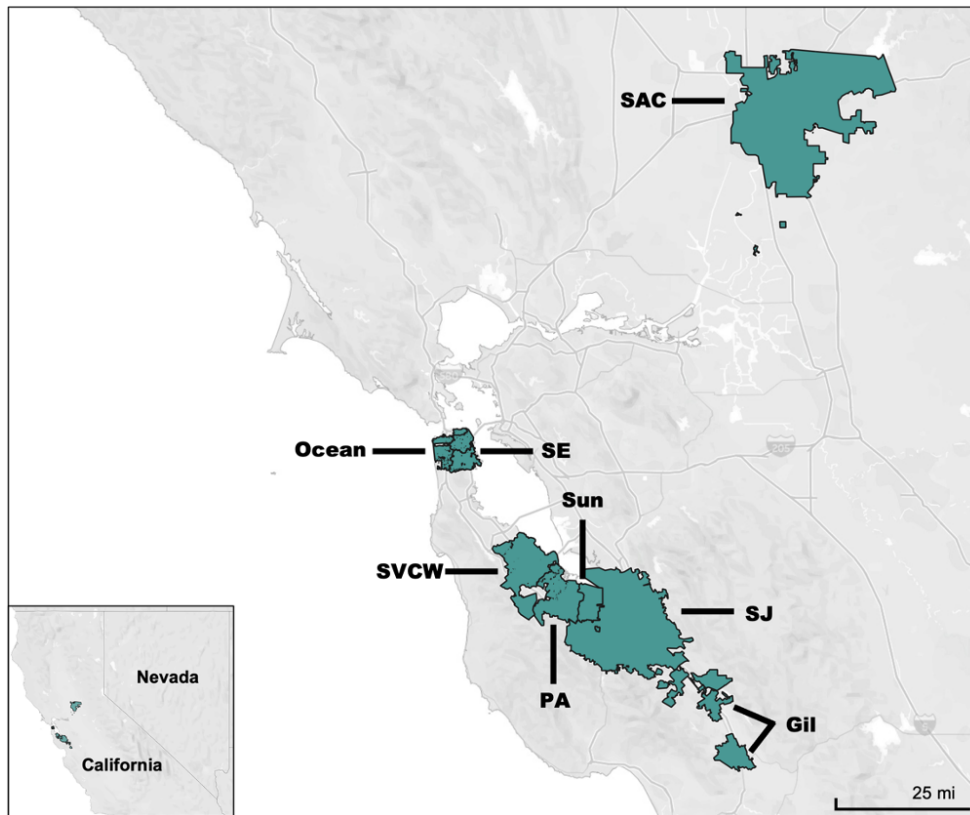

156  
157  
158

Figure S1. Map of sewersheds participating in the study.

159

## Environmental Microbiology Minimum Information Checklist

### Study Description

Study: SCAN  
Date: March 2023  
Completed by: Alexandria Boehm

| Environmental Sampling       | Sample Treatment                                                    | Sample Reduction                                                                                      | Nucleic Acid Extraction                  | Reverse Transcription                                            | PCR Detection                                                                                                               | Analysis                                    |
|------------------------------|---------------------------------------------------------------------|-------------------------------------------------------------------------------------------------------|------------------------------------------|------------------------------------------------------------------|-----------------------------------------------------------------------------------------------------------------------------|---------------------------------------------|
| Described in methods section | <input type="checkbox"/> Performed<br>No sample treatment performed | <input checked="" type="checkbox"/> Performed<br>Centrifugation was used, as described in the methods | Methods provided in the Data Descriptor. | <input checked="" type="checkbox"/> Performed<br>One Step RT-PCR | <input type="checkbox"/> qPCR <input checked="" type="checkbox"/> dPCR<br>All methods provided including the dMEI checklist | No formal analysis was done in this project |

  

### Control Checklist

|                         | Environmental Sampling              | Sample Treatment         | Sample Reduction                    | Nucleic Acid Extraction             | Reverse Transcription               | PCR Detection                       |                   |
|-------------------------|-------------------------------------|--------------------------|-------------------------------------|-------------------------------------|-------------------------------------|-------------------------------------|-------------------|
| Step performed          | <input checked="" type="checkbox"/> | <input type="checkbox"/> | <input checked="" type="checkbox"/> | <input type="checkbox"/>            | <input checked="" type="checkbox"/> | <input checked="" type="checkbox"/> |                   |
| Step has control info   | <input type="checkbox"/>            | <input type="checkbox"/> | <input type="checkbox"/>            | <input checked="" type="checkbox"/> | <input checked="" type="checkbox"/> | <input checked="" type="checkbox"/> | Negative Controls |
| # control replicates    | 0                                   | 0                        | 0                                   | 3                                   | 3                                   | 3                                   |                   |
| Control result reported | <input type="checkbox"/>            | <input type="checkbox"/> | <input type="checkbox"/>            | <input checked="" type="checkbox"/> | <input checked="" type="checkbox"/> | <input checked="" type="checkbox"/> |                   |
| Data handling reported  | <input checked="" type="checkbox"/> | <input type="checkbox"/> | <input checked="" type="checkbox"/> | <input checked="" type="checkbox"/> | <input checked="" type="checkbox"/> | <input checked="" type="checkbox"/> |                   |
| Control introduced      | <input type="checkbox"/>            | <input type="checkbox"/> | <input checked="" type="checkbox"/> | <input type="checkbox"/>            | <input type="checkbox"/>            | <input type="checkbox"/>            | Positive Controls |
| Internal/External       | N/A                                 | N/A                      | Internal                            | External                            | External                            | External                            |                   |
| Independent/Parallel    | N/A                                 | N/A                      | Parallel                            | Independent                         | Independent                         | Independent                         |                   |
| Step has control info   | <input type="checkbox"/>            | <input type="checkbox"/> | <input checked="" type="checkbox"/> | <input checked="" type="checkbox"/> | <input checked="" type="checkbox"/> | <input checked="" type="checkbox"/> |                   |
| # control replicates    | 0                                   | 0                        | 10                                  | 1                                   | 1                                   | 1                                   |                   |
| Control result reported | <input type="checkbox"/>            | <input type="checkbox"/> | <input checked="" type="checkbox"/> | <input checked="" type="checkbox"/> | <input checked="" type="checkbox"/> | <input checked="" type="checkbox"/> |                   |
| Data Handling reported  | <input type="checkbox"/>            | <input type="checkbox"/> | <input checked="" type="checkbox"/> | <input checked="" type="checkbox"/> | <input checked="" type="checkbox"/> | <input checked="" type="checkbox"/> |                   |

  

### Process Checklist

#### Environmental Sampling

- Sampling Procedure
- Number of samples
- Sample amount, mean, range
- Sampling locations, dates, times

#### Sample Reduction

- Performed
- Reduction procedure
- Reagents
- Concentration Factor

#### qPCR or dPCR

- Target gene name, amplicon length
- Thermocycling temperatures and times
- Master mix: composition, vendors, concentrations
- Additives: vendors, concentrations
- Template amount added, pre-treatment (if any)
- Primers: sequences, concentrations, vendors, references
- Amplicon confirmation method (probe, melt curve, etc)
- Probe sequence, concentration, vendor, reference
- Instrumentation
- Equivalent volume of sample analyzed by PCR
- Inhibition assessment procedure
- Inhibition control description (if used)
- Number samples tested and found inhibited

#### Sample Treatment

- Performed
- Treatment procedure
- Reagents

#### Nucleic Acid Extraction

- Extraction procedure
- Amount extracted, amount obtained
- Extract storage conditions

#### Reverse Transcription

- Performed
- One or two step
- cDNA storage conditions (if two step)
- Reaction temperatures and times
- Reaction reagents and concentrations
- Priming method
- Reaction volume, added template amount
- Inhibition assessment procedure
- Inhibition control description (if used)
- Number samples tested and found inhibited

#### Analysis – dPCR

- Threshold settings
- Technical replicates, number, well merging
- Partitions measured, number, mean, variance
- Partition volume
- Target copies per partition, mean, variance
- Program used for dPCR analysis
- Explanation of control results, example plots

#### Analysis – qPCR

- Method for handling failed negative controls
- Technical replicates, number, calculations
- Calibration standards: description and source
- Method of quantifying standards
- Calibration curve slope
- Calibration curve R2
- Lowest standard measured or 95% LOD
- Cq value determination method

160

161

162 Figure S2. EMMI checklist<sup>6</sup>. Details of the partition numbers and volume, and copy numbers per  
 163 partition are reported in a Data Descriptor<sup>4</sup>.

164

S6

165  
166  
167

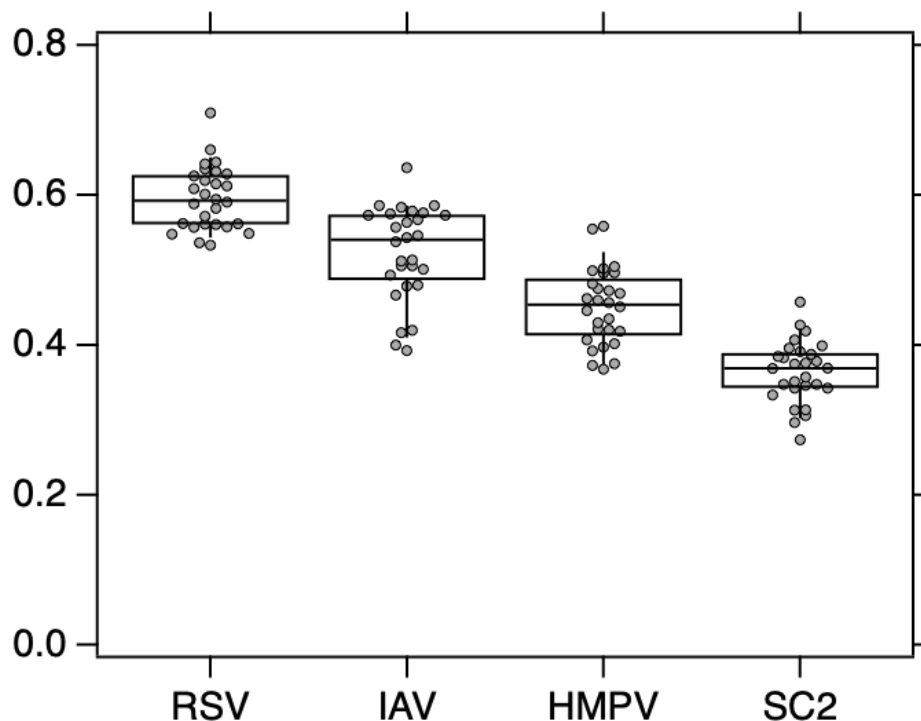

168  
169 Figure S3. The distribution of between POTW Kendall's tau values for each human viral target.  
170 There are 28 tau values for each virus (each combination of 2 POTW among the 8), and those  
171 are shown as gray circles. The box and whisker plot provides a visualization of the distribution.  
172 The whiskers extend from the 9th to 91st percentiles. The bottom and top of the box represent  
173 the 25th and 75th percentiles, the line through the middle of the box represents the median.  
174  
175  
176  
177  
178

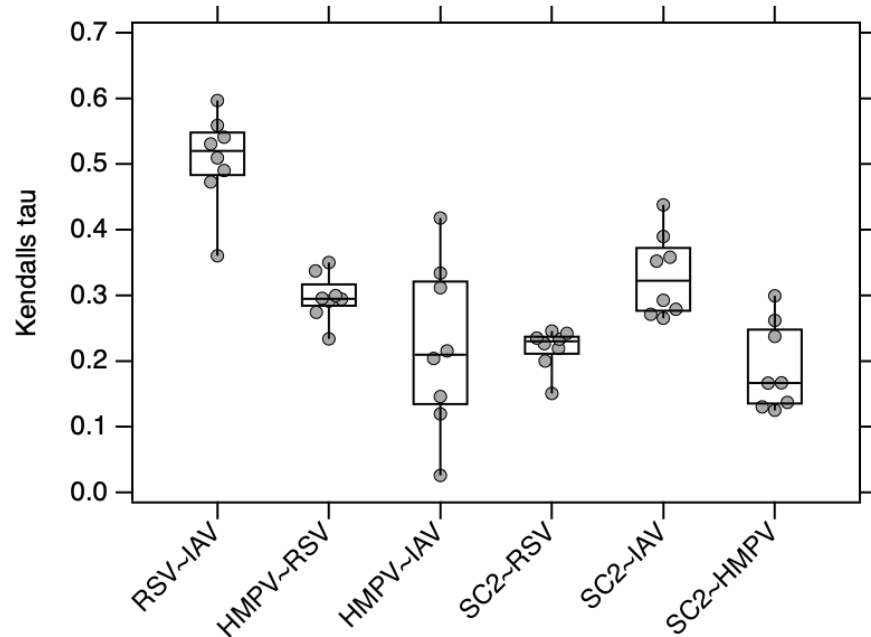

179  
180 Figure S4. The distribution of within POTW Kendall's tau values for different human viral targets  
181 comparisons (bottom axis). There are 8 tau values for each virus combination (1 for each  
182 POTW), and those are shown as gray circles. The box and whisker plot provides a visualization  
183 of the distribution. The whiskers extend from the 9th to 91st percentiles. The bottom and top of  
184 the box represent the 25th and 75th percentiles, the line through the middle of the box  
185 represents the median. SC2 is SARS-CoV-2. All tau values are shown, even those that are not  
186 significantly different from 0.  
187

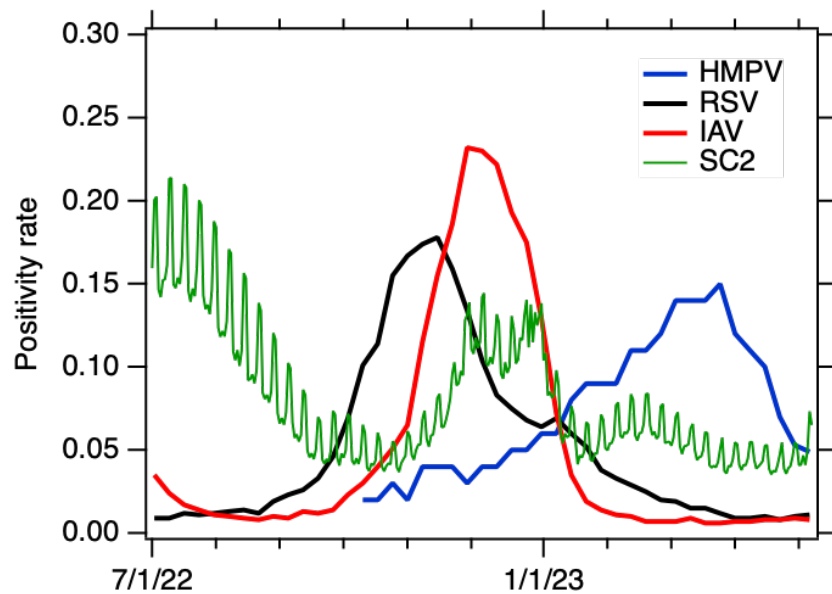

188  
189  
190 Figure S5. Positivity rates for influenza A (IAV), RSV, human metapneumovirus (HMPV) and  
191 SARS-CoV-2 in clinical specimens aggregated across the state of California. Data are reported  
192 weekly for IAV, RSV, and HMPV, and daily for SARS-CoV-2.  
193  
194  
195

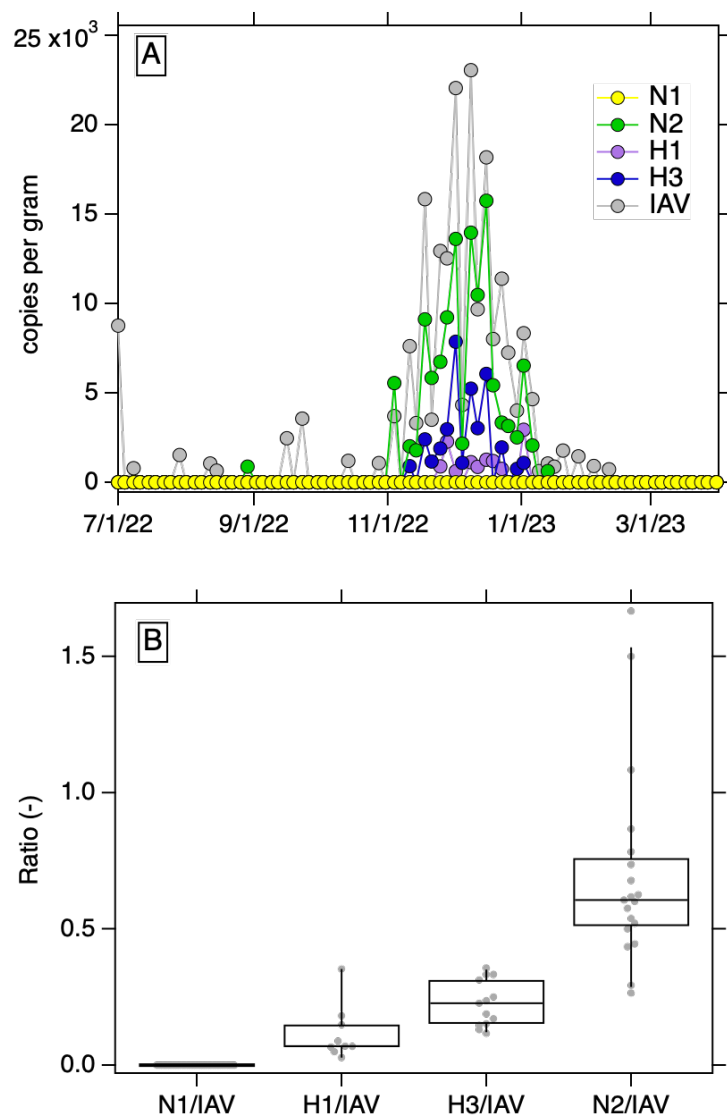

196  
197  
198  
199  
200  
201  
202  
203  
204  
205  
206  
207  
208  
209  
210

Figure S6. Panel A. Concentrations of IAV, N1, N2, H1, and H3 in copies per gram dry weight in archived samples from SJ POTW. Panel B. Distributions of the ratio of each IAV subtype marker and IAV measured in the archived samples. Only non-zero ratios are included, aside from N1 for which all values were 0. The whiskers extend from the 9th to 91st percentiles. The bottom and top of the box represent the 25th and 75th percentiles, the line through the middle of the box represents the median.



211  
212  
213

Table S1. Primers and probes of previously published assays.

| Target               | Primer/Probe | Sequence                       |
|----------------------|--------------|--------------------------------|
| SARS-CoV-2<br>N Gene | Forward      | CATTACGTTTGGTGGACCCT           |
|                      | Reverse      | CCTTGCCATGTTGAGTGAGA           |
|                      | Probe        | CGCGATCAAAACAACGTCGG           |
| BCoV                 | Forward      | CTGGAAGTTGGTGGAGTT             |
|                      | Reverse      | ATTATCGGCCTAACATACATC          |
|                      | Probe        | CCTTCATATCTATACACATCAAGTTGTT   |
| PMMoV                | Forward      | GAGTGGTTTGACCTTAACGTTTGA       |
|                      | Reverse      | TTGTCGGTTGCAATGCAAGT           |
|                      | Probe        | CCTACCGAAGCAAATG               |
| Influenza A          | Forward      | CAAGACCAATCYTGTCACCTCTGAC      |
|                      | Reverse      | GCATTYTGGACAAAVCGTCTACG        |
|                      | Probe        | TGCAGTCCTCGCTCACTGGGCACG       |
| RSV                  | Forward      | CTCCAGAATAYAGGCATGAYTCTCC      |
|                      | Reverse      | GCYCTYCTAATYACWGCTGTAAGAC      |
|                      | Probe        | TAACCAAATTAGCAGCAGGAGATAGATCAG |
| HMPV                 | Forward      | ACTTTATTGGAGAAGGAGCAGG         |
|                      | Reverse      | GGGTAATGRTGATCAAGRTCA          |
|                      | Probe        | AYTGGATGGCMAGAACAGCA           |

214  
215

216

217

218 Table S2. Parameters used with primer design software.

- 219 ● Product size ranges: 60-275
- 220 ● Primer size: min 15, opt 20, max 36
- 221 ● Primer melting temperature: min 50°C, optimal 60°C, max 65°C - GC% content: min
- 222 40%, optimal 50%, high 60%
- 223 ● concentration of divalent cations = 3.8 mM
- 224 ● concentration of dNTPs needs to be 0.8 mM
- 225 ● Internal Oligo: size min 15, optimal 20, max 30
- 226 ● Internal Oligo: Melting temp min 62°C, optimal 63°C, max 70°C
- 227 ● Internal Oligo: GC% min 30%, optimal 50%, max 80%

228

229

230

231 Table S3. Novel influenza A (IAV) H1, H3, N1, and N2 assays developed in this study. Forward and.  
 232 reverse primers and probes are provided. Assays were run at 59°C annealing temperatures.

|          |         |                          |
|----------|---------|--------------------------|
| H1 (IAV) | Forward | GTGAATCACTCTCCACAGCA     |
|          | Reverse | TGATTRGGCCATGAACTTGT     |
|          | Probe   | TGGAACGTGTTACCCAGGAGA    |
| H3 (IAV) | Forward | GAGRTCAGATGCACCCATTG     |
|          | Reverse | TCTGGTACATTYCGCATCCC     |
|          | Probe   | TGCATCACTCCAAATGGAAGCA   |
| N1 (IAV) | Forward | TCYCCCTTGGAAATGCAGAAC    |
|          | Reverse | ACCAAGCGACTGACTCAAAT     |
|          | Probe   | AGGAGYCCATATCGAACCT      |
| N2 (IAV) | Forward | GTGTTATCAATTTGCCCTTGG    |
|          | Reverse | GGTCCGATAAGGGGTCCTAT     |
|          | Probe   | CAGGGAACAACACTAAACAACGTG |

233
